1 The vasodilatory mechanism of nitric oxide and hydrogen sulfide in human  
2 mesenteric artery of colorectal cancer patients: role of potassium channels

3 Awat Y. Hassan<sup>1¶</sup>, Ismail M. Maulood<sup>1¶</sup> and Abbas Salihi<sup>1,2¶\*</sup>

4

5 <sup>1</sup>Department of Biology, College of Science, Salahaddin University-Erbil,  
6 Erbil, Kurdistan Region, Iraq

7 <sup>2</sup>Department of Medical Analysis, Faculty of Science, Tishk International  
8 University, Erbil, Iraq

9

10 ¶These authors contributed equally to this work

11 \*Corresponding author: Abbas Salihi

12 Email: [abbas.salihi@su.edu.krd](mailto:abbas.salihi@su.edu.krd)

13 Short title: Vasodilatory mechanism of NO and H<sub>2</sub>S in human mesenteric  
14 artery of CRC patients

15

16

17

18

19

20

21

22

23

24

## 25 **Abstract**

26       Recent studies focused on the role of gasotransmitters in cancer  
27 progression and prevention. Therefore, this study was designed to explore  
28 the vasodilator activity of NO and H<sub>2</sub>S in human mesenteric artery of CRC  
29 patients via activation of K<sup>+</sup> channels. For this purpose, two sets of  
30 experiments were established. The blood samples from CRC patients were  
31 obtained to detect serum levels of Endocan and MDA. Moreover, the role of  
32 K<sup>+</sup> channels were assessed in mediating vasodilation of human mesenteric  
33 artery in response to SNP and Na<sub>2</sub>S. The level of serum Endocan was  
34 decreased in CRC patients compared to healthy individuals, while serum  
35 MDA was not changed. The arterial rings precontracted with NE were first  
36 relaxed by cumulative addition of increasing concentrations of either SNP  
37 (30nM-30μM) or Na<sub>2</sub>S (1-6mM). Then maximal relaxation rates were  
38 calculated for four times at each 15min intervals. Preincubation of arterial  
39 rings for 20min with individual K<sup>+</sup> channels blockers were significantly  
40 reduced relaxation caused by SNP and Na<sub>2</sub>S at different time intervals.  
41 Furthermore, pretreatment of L-NAME did not change the vasodilation  
42 induced by Na<sub>2</sub>S. Vasodilation of CRC mesenteric unchanged by synergistic  
43 application of SNP and Na<sub>2</sub>S. While preincubation of arterial rings with PAG  
44 significantly enhanced vasodilation induced by SNP. In conclusion, these  
45 results indicate that endothelial dysfunction and oxidative stress do not take  
46 part in the pathogenesis of CRC. The dilatory mechanisms of NO and H<sub>2</sub>S  
47 in mesenteric arteries of CRC patients are K<sup>+</sup> channels and time dependent,

48 and the activity of CSE enzyme slows down the vasodilator ability of  
49 exogenous NO.

50 **Keywords:** Nitric oxide, Hydrogen sulfide, Mesenteric arteries, Potassium  
51 channels, Colorectal cancer.

## 52 **Introduction**

53 Colorectal cancer (CRC) is the third most frequently occurring  
54 malignancy and the second leading mortality cause of cancer worldwide.  
55 More than 1.8 million new CRC cases and 881,000 deaths was reported in  
56 2018, accounting for about 1 in 10 cases and deaths [1]. Regardless of, the  
57 low incidence of CRC in the Middle East [2], the Kurdistan region of Iraq  
58 has a higher annual incidence rate of cancer, and it represents about 38 to  
59 61.7 cases/100,000 population and it's the fourth cancer in both sexes  
60 separately, and the cause of mortality of about 8.6% [3]. The most common  
61 histopathological type of CRC in this region is adenocarcinoma [4].

62 Endogenous gasotransmitters mainly nitric oxide (NO), carbon  
63 monoxide (CO), and hydrogen sulfide (H<sub>2</sub>S) are generated endogenously by  
64 specific enzymes [5]. NO is produced from L-arginine by the enzyme NO  
65 synthase (NOS) [6, 7] while H<sub>2</sub>S is synthesised from L-cysteine by either  
66 cystathionine beta-synthase (CBS), cystathionine gamma-lyase (CSE) or  
67 mercaptopyruvate sulfurtransferase (MST) [8, 9]. They can modulate  
68 different biological pathways and functions at a physiologically relevant  
69 concentration [10] by the opening of various kinds of membrane ion

70 channels [11]. NO is an essential regulator of angiogenesis [12] and  
71 vasorelaxation through activation of guanylate cyclase and production of  
72 cyclic guanine monophosphate (cGMP) [13]. cGMP, in turn, will increase  
73 an endothelial  $\text{Ca}^{+2}$  concentration and finally the opening of localised  $\text{Ca}^{+2}$ -  
74 dependent potassium ( $\text{K}_+$ ) channels ( $\text{K}_{\text{Ca}}$ ) [14]. In contrast,  $\text{H}_2\text{S}$  exerts its  
75 effect on vasodilation [15] and angiogenesis [16] via direct activation of  
76  $\text{K}_{\text{ATP}}$  channels [17].

77       Beside their independent actions, NO and  $\text{H}_2\text{S}$  can act synergistically or  
78 antagonistically to elicit their downstream effects, ranging from their  
79 biosynthesis to the signalling cascade in a cell target. NO, and  $\text{H}_2\text{S}$  are  
80 mutually dependent on regulating the vasodilation, angiogenesis [18, 19] and  
81 endothelial homeostasis [20] at different levels. The role of these gases in  
82 cancer is quite confusing, as both gases have tumour promotion and anti-  
83 tumour properties [21] and they can modulate various cancer cell functions,  
84 such as proliferation, invasion, metastasis, and tumour angiogenesis [22].  
85 Moreover, the enzymes responsible for NO and  $\text{H}_2\text{S}$  production are  
86 upregulated in CRC cells, endogenously produced low-to-mid  
87 concentrations of  $\text{H}_2\text{S}$  or NO support cell proliferation, while exogenous  
88 delivery of  $\text{H}_2\text{S}$  or NO can suppress the colon cancer cells division [23].

89       Intra-tumoral blood vessels are of paramount for tumour growth,  
90 metastasis and therapy [24] and the acquisition of a differential reactivity by  
91 functional, mature blood vessels in the tumour microenvironment represents  
92 a proper target for antitumor therapy [25]. Because cancer cells are

93 exhibiting an accelerated metabolism, therefore they are demanding high  
94 reactive oxygen species (ROS) concentrations to maintain their high  
95 proliferation rate [26]. Thus, the high levels of ROS can damage or kill cells  
96 by oxidising proteins, lipids, and nucleic acids [27]. Overall, these  
97 observations elucidate that oxidative stress and cancer are closely linked  
98 [28]. A growing number of researches is investigating the consequences of  
99 ROS and endothelial dysfunction in cancer [29]. Nonetheless, to the best of  
100 our knowledge, no researcher has linked between oxidative stress,  
101 endothelial function and vascular reactivity to NO and H<sub>2</sub>S in CRC patients.  
102 Therefore, the study aimed to evaluate endocan as an endothelial function  
103 marker and MDA as an oxidative stress marker in CRC patients. Also we  
104 were aimed to evaluate the mechanisms responsible for NO and H<sub>2</sub>S induced  
105 vasodilation in human mesenteric artery of CRC patients. To approach, these  
106 questions, possible roles of different K<sup>+</sup> channels in the vasodilation response  
107 produced by NO and H<sub>2</sub>S has been assessed.

## 108 **Subjects and Methods**

### 109 **Subjects**

110 This study is a case-control study. The study was approved by the human  
111 ethics committee belonging to College of Science, Salahaddin University-  
112 Erbil, and the informed consent from all the patients was obtained. For the  
113 first experiment, the subjects were recruited in two hospitals in Erbil city,  
114 Rizgray hospital Oncology department and Nanakaly Hospital. Venous

115 blood was taken from 44 CRC patients with different stages of colorectal  
116 cancer (24 males and 20 females). Also, 40 healthy volunteers of similar age  
117 were recruited in this study as healthy individuals. While for the second  
118 experiment colorectal tumour specimen were obtained from colorectal  
119 cancer patients undergoing partial colectomy at CMC and welfare private  
120 hospitals in Erbil city.

121 Patients were selected according to histological evidence of colonic or  
122 rectal adenocarcinoma when ages of patients greater than 18 years and they  
123 were able to donate blood. The blood samples were obtained by phlebotomy  
124 under aseptic technique. Blood was put into clot activator tube for serum  
125 separation, and then the sera were separated under 2000rpm centrifugation  
126 for 5min. In contrast, patients with underlying immunodeficiency disorder  
127 or immunodeficiency state and individuals who had other co-morbid health  
128 problems which could introduce heterogeneity to the sample, (e.g. arthritis,  
129 asthma, diabetes mellitus, hypertension, and other inflammatory diseases)  
130 were excluded.

## 131 **Methods**

### 132 **Determination of Endocan**

133 The concentration of Endocan was determined according to Sandwich-  
134 ELISA method. The micro ELISA plate was pre-coated with an antibody  
135 specific to Endocan. Standards or samples were added to the suitable micro  
136 ELISA plate wells and combined with the specific antibody. Then a

137 biotinylated detection antibody specific for Endocan and Avidin-  
138 Horseradish Peroxidase conjugate and substrate were added to each  
139 microplate well. Only those wells that contain Endocan, biotinylated  
140 detection antibody and Avidin-HRP conjugate appeared blue in colour and  
141 reaction was stopped with 1N H<sub>2</sub>SO<sub>4</sub> solution, and the colour turns yellow.  
142 The absorbance was measured spectrophotometrically at a wavelength of  
143 450nm.

#### 144 **Determination of Serum Malondialdehyde**

145 Malondialdehyde (MDA) was determined according to Ohkawa  
146 method [30]. The procedure was started by TBA preparation; in which 0.66g  
147 of Thiobarbituric acid (TBA) dissolved in 100 ml of 0.05M of NaOH with  
148 simple heating. Then, Trichloroacetic acetic acid (TCA) was prepared by  
149 dissolving 17.5g of TCA in 100 ml distilled water; while TCA2 was prepared  
150 by dissolving 70 g of TCA in 100 ml distilled water. Finally, 150 ml of  
151 serum was added 1ml of TCA1 mixed for 2 min and incubated in boiling  
152 water bath for 15 min, then 1 ml of TCA2 was added and incubated for 20  
153 min at 37C° then centrifuged for 5 min at 2000 rpm the supernatant was read  
154 at 532 nm.

#### 155 **Myographical recording**

#### 156 **Vessel Collection and preparation**

157 Human mesenteric arteries from patients suffering from CRC and  
158 underwent partial colectomy was collected. The arteries supplying blood to  
159 the tumour were dissected out surgically and directly were added to a beaker  
160 containing cold modified Krebs solution (Fig 1) and aerated with 95% O<sub>2</sub>  
161 and 5% CO<sub>2</sub>. In the laboratory, the excess tissue and fat were removed, and  
162 the arteries were cut into rings about 3-4 mm long.

163 **Fig 1.** Mesenteric artery feeding colon tumour.

#### 164 **Recording of Isometric tension**

165 The procedure of [31] with some modifications was followed to study  
166 the vasodilator activity of the isolated mesenteric arteries. The arterial rings  
167 were held up by two stainless steel clamps. The first clamp was attached to  
168 a hook at the underside of the organ bath jacket and the other was connected  
169 to the force transducer through a thread to record the isometric tension of the  
170 mesenteric arteries, and the data was recorded by LabChart data acquisition  
171 software. The held up arterial rings were immersed in Krebs solution (NaCl  
172 5.10gm/L, NaHCO<sub>3</sub> 1.94/L, MgSO<sub>4</sub> 0.686gm/L, KCl 2.24gm/L, KH<sub>2</sub>PO<sub>4</sub>  
173 0.15gm/L, CaCl<sub>2</sub> 0.277gm/L, C<sub>6</sub>H<sub>12</sub>O<sub>6</sub> 2gm /L), contained in a 10 ml organ  
174 chamber. Krebs solution was maintained at pH 7.4 and was constantly  
175 aerated with 95% O<sub>2</sub> 5% CO<sub>2</sub> at 37°C (Panlab Harvard Apparatus, USA).

176 The mesenteric arterial rings were tensed to a stable basal strain of 4gm  
177 before left to equilibrate for 2hrs. To remove cellular metabolites, Krebs  
178 solution was replaced every 15-20min intervals in the bath chamber until it



179 reaches the stability and the experimental substances acquaint with the bath  
180 chambers according to the protocols, the arteries were incubated with drugs  
181 for 20 minutes then norepinephrine (NE) 1 $\mu$ M until reaches maximum  
182 contractility and plateau, then relaxation happened by bolus single dose  
183 application of sodium nitroprusside (SNP) or sodium disulfide (Na<sub>2</sub>S).

## 184 **Experimental protocol**

185 The arterial rings precontracted with NE were first relaxed by  
186 cumulative addition of either SNP (30nM-30 $\mu$ M) or Na<sub>2</sub>S (1-6 mM). Based  
187 on these initial experiments, relative half-inhibitory concentration (IC<sub>50</sub>) of  
188 SNP (2.3 $\mu$ M), Na<sub>2</sub>S (2.4mM) had retested for the ability to relax  
189 precontracted rings in three separate sets of experiments. In the first  
190 experiment, when the NE-induced contraction reached the uppermost value,  
191 SNP (2.3 $\mu$ M) or Na<sub>2</sub>S (2.4mM) was added and left for 60min, and the  
192 maximal relaxation rate (%) was calculated four times at each 15min  
193 intervals (n=8). Then the role of K<sup>+</sup> channels in the progress of SNP and  
194 Na<sub>2</sub>S mediated relaxation were tested via incubation of the arterial rings for  
195 20min with the Tetraethylammonium (TEA;1mM), Glibenclamide  
196 (GLIB;0.1 $\mu$ M), Barium Chloride (BaCl<sub>2</sub>; 1mM) and 4-aminopyridine (4-  
197 AP;1mM). While, in the second experiment, the role of endogenous NO and  
198 H<sub>2</sub>S were tested by preincubation of arterial rings with either L-NAME  
199 (3x10<sup>-4</sup>M) or D,L- propargylglycine (PAG) (10mM), antagonists of eNOS  
200 and CSE for 20min before applying SNP (n=8). Finally, to examine whether

201 the combination of H<sub>2</sub>S and NO potentiate or inhibit the vasorelaxation when  
202 the NE-induced contraction reached the highest value, SNP and Na<sub>2</sub>S were  
203 added simultaneously and left for 60 min, (n=8).

## 204 **Statistical analysis**

205 The statistical analysis of myographical data was performed using two-way  
206 analysis of variance (ANOVA) followed by Bonferroni *post hoc* test.  
207 Maximum relaxation responses were calculated as a percentage of the  
208 contraction produced by NE and were expressed as the means±standard error  
209 of the mean (SEM). The tension created by NE was defined as 0% relaxation,  
210 and the baseline tension before the addition of NE was determined as 100%  
211 relaxation. While, comparison between CRC and healthy individuals were  
212 made by Mann-Whitney test and the values were represented as median and  
213 quartiles. A p-value less than 0.05 (P<0.05) were considered statistically  
214 significant. The graphs, calculation and statistical analyses were performed  
215 using GraphPad Prism software 6.0 (GraphPad Software, San Diego,  
216 California, USA).

## 217 **Results**

### 218 **Serum Endocan and Malondialdehyde concentration**

219 Serum endocan concentration was markedly lower in the CRC patients  
220 (67.56, 43.04-94.28) than the healthy individuals (88.68, 59-101.3). While,  
221 there were no significant differences in MDA concentration between the

222 CRC patients (3.62, 2.86-4.96) and the healthy individuals (3.78, 3.23-4.24),  
223 Fig 2A and B, respectively.

224 **Fig 2. Comparison between Endocan (pg/mL), MDA ( $\mu\text{mol/L}$ ) level in a**  
225 **healthy group and CRC patients.** Endocan significantly ( $*P<0.05$ ,)  
226 decreased in CRC patients compared to the healthy control group, while  
227 Non-significant change was observed in MDA level. The comparison was  
228 performed using the unpaired Mann-Whitney test.

### 229 **Measurement of $\text{IC}_{50}$**

230 Sodium nitroprusside at concentrations from 30nM-30 $\mu\text{M}$  caused a  
231 relaxant effect on mesenteric arteries of CRC when precontracted with NE  
232 (1  $\mu\text{M}$ ) with  $\text{IC}_{50}$ 's of  $2.42\pm 0.16 \mu\text{M}$  ( $\text{IC}_{50}$  of CI 95% between 1.18 to 4.95  
233  $\mu\text{M}$ ), and the percentage of relaxation was  $80.74\pm 7.256\%$ . While  $\text{Na}_2\text{S}$  at  
234 concentrations from 1-6 mM had a relaxant effect on mesenteric arteries of  
235 CRC precontracted with NE, the calculated  $\text{IC}_{50}$ 's was  $3.54\pm 1.07\text{mM}$  ( $\text{IC}_{50}$   
236 of CI 95% between 1.4 to 5.68mM), and the percentage of relaxation was  
237  $84.43\pm 22.05\%$ . Concentration-response curve for the effect of SNP and  $\text{Na}_2\text{S}$   
238 against NE-mediated contractions are shown in Fig 3A and B, respectively.

239 **Fig 3.** Cumulative dose-response curve for the vasorelaxant effects of (A)  
240 SNP (30nM-30 $\mu\text{M}$ ); and (B)  $\text{Na}_2\text{S}$  (1-6mM) on NE (1 $\mu\text{M}$ ) induced  
241 contraction in mesenteric arteries of CRC patients.

## 242 **The role of K<sup>+</sup> channels in the NO-induced relaxation**

243 To identify the role K<sup>+</sup> channels on the time-dependent change of CRC  
244 feeding mesenteric arteries relaxation responses to effect of SNP, arterial  
245 rings were incubated with K<sup>+</sup> channels blockers for 20 min before the  
246 addition of SNP and the net vasorelaxation effect of SNP in mesenteric  
247 arteries was measured every 15min over the course of 60 min. Preincubation  
248 of mesenteric arteries with either GLIB (10 $\mu$ M, n=6), TEA (1 mM, n=6) or  
249 4-AP (1 mM, n=6) remarkably reduced the net vasorelaxation effect of SNP  
250 in mesenteric arteries at all-time intervals. While, the reduction of  
251 vasorelaxation responses of SNP was lasted for 45 min after preincubation  
252 of the mesenteric arterial ring with BaCl<sub>2</sub> (1mM, n=6), as shown in Table 1  
253 and Fig 4.

254 **Table 1. Involvement of K<sup>+</sup> channels in the mechanism of time-**  
255 **dependent relaxation responses to effect of SNP in mesenteric arteries**  
256 **of CRC patients**

|                         | Time            |                 |                 |                 |
|-------------------------|-----------------|-----------------|-----------------|-----------------|
|                         | 15 min          | 30 min          | 45 min          | 60 min          |
| <b>Control</b>          | 41.7 $\pm$ 6.09 | 62.9 $\pm$ 5.64 | 63.1 $\pm$ 5.65 | 62.7 $\pm$ 6.38 |
| <b>TEA</b>              | 3.6 $\pm$ 4.52  | 12.9 $\pm$ 10.5 | 17.9 $\pm$ 12.7 | 20.6 $\pm$ 13.8 |
| <b>GLIB</b>             | 0.1 $\pm$ 3.14  | 0.3 $\pm$ 9.04  | 4.4 $\pm$ 12.2  | 7.4 $\pm$ 13.4  |
| <b>BaCl<sub>2</sub></b> | 5.9 $\pm$ 3.39  | 23.7 $\pm$ 11.8 | 33.9 $\pm$ 15.6 | 40.4 $\pm$ 17.2 |
| <b>4-AP</b>             | 5.1 $\pm$ 2.39  | 23.5 $\pm$ 5.67 | 35.5 $\pm$ 6.77 | 39.4 $\pm$ 8.15 |

257

258 **Fig 4. Time-dependent change of relaxation responses to effect of SNP**  
259 **in mesenteric arteries preincubated with TEA (1mM), BaCl<sub>2</sub> (1mM), 4-**

260 **AP (1mM), GLIB (10µM) respectively.** (A) SNP-induced vasorelaxation  
 261 significantly inhibited by TEA (■) pretreatment (\*\*P<0.01, 5 min, \*\*\*  
 262 P<0.001, 30, 45, 60min). (B) SNP-induced vasorelaxation significantly  
 263 inhibited by GLIB (■) pretreatment (\*\*P<0.001, 15, 30, 45,60min). (C)  
 264 SNP -induced vasorelaxation significantly inhibited by BaCl<sub>2</sub> (■)  
 265 pretreatment (\*\*P<0.01, 15 and 30min , (\*P<0.05, 45 min). (D) SNP-  
 266 induced vasorelaxation significantly inhibited by 4-AP (■) pretreatment  
 267 (\*\*P<0.01, 15 and 45 min, \*\*P<0.01, 30min, \*P<0.05, 60 min).

## 268 **The role of K<sup>+</sup> channels in the H<sub>2</sub>S-induced relaxation**

269 The impairment of Na<sub>2</sub>S induced mesenteric artery relaxation taken from  
 270 CRC patients was continued throughout the experiment when the arteries  
 271 were previously incubated with either GLIB (n=6) or 4-AP (n=6). While  
 272 BaCl<sub>2</sub> reduced vasorelaxation responses produced by Na<sub>2</sub>S only in the  
 273 middle of the experiment. In contrast, TEA had failed to amend the  
 274 vasorelaxation responses of Na<sub>2</sub>S, as shown in Table 2 and Fig 5.

275 **Table 2. Involvement of K<sup>+</sup> channels in the mechanism of time-**  
 276 **dependent relaxation responses to effect of Na<sub>2</sub>S in mesenteric arteries**  
 277 **of CRC patients**

|                         | Time      |           |           |           |
|-------------------------|-----------|-----------|-----------|-----------|
|                         | 15 min    | 30 min    | 45 min    | 60 min    |
| <b>Control</b>          | 37.1±6.26 | 73±10.1   | 68.8±9.85 | 64.7±9.21 |
| <b>TEA</b>              | 13.9±4.52 | 81.3±10.5 | 105±12.7  | 116±13.8  |
| <b>GLIB</b>             | 7.8±1.91  | 17.9±4.82 | 29.4±6.71 | 37.5±7.61 |
| <b>BaCl<sub>2</sub></b> | 17±13.2   | 29.5±21.7 | 37.4±24.1 | 40.5±25.4 |

|             |        |       |           |          |
|-------------|--------|-------|-----------|----------|
| <b>4-AP</b> | 2±1.34 | 2±2.6 | -0.3±3.53 | 3.9±3.72 |
|-------------|--------|-------|-----------|----------|

278

279 **Fig 5. Time-dependent change of relaxation responses to the effect of**  
280 **Na<sub>2</sub>S in mesenteric arteries preincubated with TEA (1mM), GLIB**  
281 **(10µM.), BaCl<sub>2</sub> (1mM), 4-AP (1mM) respectively.** (A) TEA (■) had no  
282 significant effect on Na<sub>2</sub>S -induced time-dependent arterial relaxation. (B)  
283 Na<sub>2</sub>S -induced vasorelaxation significantly inhibited by GLIB (■)  
284 pretreatment (\*\*\*) P<0.001, 30, 45, min, \* P<0.05, 60min). (C) Na<sub>2</sub>S -  
285 induced vasorelaxation significantly inhibited by BaCl<sub>2</sub> (■) pretreatment (\*  
286 P<0.05, 30min). (D) Na<sub>2</sub>S -induced vasorelaxation significantly inhibited by  
287 4-AP (■) pretreatment (\*\* P<0.01, 15min, \*\*\* P<0.001, 30, 45, 60min).

## 288 **Interaction effects of SNP and Na<sub>2</sub>S**

289 Combination of SNP and Na<sub>2</sub>S did not modify relaxation responses at  
290 all time-intervals in comparison to the relaxation induced by individual  
291 application of either SNP or Na<sub>2</sub>S. Furthermore, preincubation of arterial  
292 rings with L-NAME (n=6) did not change the extent of the Na<sub>2</sub>S-induced  
293 relaxation at all time-courses of the study. On the other hand, treating the  
294 mesenteric arterial rings with PAG (n=6) significantly increased  
295 vasorelaxation induced by SNP at all time-courses of the study, as shown in  
296 Table 3 and Fig 6.

297 **Table 3. The combination effects of SNP and Na<sub>2</sub>S, L-NAME and PAG**  
298 **preincubation on the time-dependent relaxation responses of the**  
299 **mesenteric arteries of CRC patients**

|                            | Time      |            |            |            |
|----------------------------|-----------|------------|------------|------------|
|                            | 15 min    | 30 min     | 45 min     | 60 min     |
| <b>SNP+Na<sub>2</sub>S</b> | 34.7±8.96 | 48.2±10.4  | 47.9±8.09  | 48.7±8.67  |
| <b>L-NAME</b>              | 35.8±5.73 | 56.8±6.23  | 61.2±8.87  | 57.1±8.3   |
| <b>PAG</b>                 | 89±5.87   | -25.7±9.42 | -36.5±11.3 | -42.3±12.9 |

300

301 **Fig 6. The combination effects of SNP and Na<sub>2</sub>S, L-NAME and PAG**  
302 **preincubation on the time-dependent relaxation responses of the**  
303 **mesenteric arteries precontracted with NE.** (A) The combination of SNP  
304 and Na<sub>2</sub>S (▲) did not change the time-dependent relaxation. (B) L-NAME  
305 (0.3mM; ■) had no significant effect on Na<sub>2</sub>S-induced time-dependent  
306 relaxation. (C) SNP-induced relaxation significantly inhibited by PAG  
307 (10mM; ■) pretreatment (\*\*\*) P<0.001, 15, 30,45,60min).

## 308 Discussion

309 The first part of the present study ascertains that endothelium cells of  
310 CRC patients are functioning normally, because the serum Endocan level  
311 markedly decreased, which is an endothelial cell marker [32]. The reason of  
312 endocan decrement was explained by [33-35], that is due to either  
313 chemotherapy or VEGF receptor-2 kinase inhibitors treatment or the  
314 downregulation of endocan expression, suggesting that the expression of  
315 endocan is related to the development and differentiation of CRC [32]. While,  
316 [36] stated that Endocan correlates with colon tumour size, depth of invasion,  
317 lymph node metastasis, distant metastasis and Dukes' staging. Also, there has

318 been a growing interest in studying MDA as a marker of oxidative stress in  
319 cancer progression [37]. In the present, we showed that the serum MDA level  
320 was not changed in CRC patients comparing to healthy individuals.  
321 Although, previous studies had been observed that MDA is increased in CRC  
322 patients [38], but [39] explained that chemotherapeutical treatment would  
323 normalize the oxidative stress in CRC patients. Taken together, these results  
324 indicate that CRC patients have intact arteries and their endothelium are  
325 functioning normally.

326 In the second part of the present study, we found that SNP profoundly  
327 relaxes mesenteric arteries in CRC patients. In this concern, the previous  
328 study conducted by [40] recorded 69% relaxation of rat mesenteric arteries,  
329 whilst the relaxation of human hand veins reached 103% [41]. Then, to  
330 explore the exact mechanism of relaxation of SNP, the role of K<sup>+</sup> channels  
331 were tested in the mesenteric arteries of CRC patients.

332 The results of the present study unveil that K<sup>+</sup> channels have a great role  
333 in the SNP-induced relaxation because pretreatment of mesenteric arteries  
334 with either TEA, GLIB, BaCl<sub>2</sub> or 4-AP markedly delayed vasodilation. NO  
335 activates several K<sup>+</sup> channels of SMCs in rat, rabbit mesenteric artery and  
336 cerebral arteries, including ATP-sensitive K<sup>+</sup> channels (Deka and Brading  
337 2004; Koh et al. 1995; Murphy and Brayden 1995) and induce membrane  
338 hyperpolarization by decreases in [Ca<sup>2+</sup>]<sub>i</sub> levels through inhibition of Ca<sup>2+</sup>  
339 influx or Ca<sup>2+</sup> release from intracellular stores [42]. Moreover, NO  
340 hyperpolarize arterial smooth muscle cells via activation both K<sub>V</sub> and K<sub>Ca</sub>



341 channels on VSMC in rat superior mesenteric artery, coronary and cerebral  
342 artery and large artery [43-45], through a cGMP-dependent mechanism, in  
343 that way inhibiting the evoked membrane depolarization and upsurge in  
344  $[Ca^{2+}]_i$  [46]. Furthermore, this result is in accordance with the earlier finding  
345 of Schubert, Krien (47), they were observed that VSMC  $K_{IR}$  currents are  
346 regulated by NO. Meanwhile, Hempelmann, Seebeck (48) displayed that  
347 neither 4-AP nor  $BaCl_2$  modulate NO-induced relaxation in rat basilar artery.  
348 This result proposes that NO might exert vasodilation possibly by the  
349 opening of different  $K^+$  channels. Hence, we can conclude that  $K^+$  channels  
350 play a central role in the vasodilation mechanism of NO.

351 Consistently, we were the first to observe that  $Na_2S$  potently relax  
352 mesenteric arteries in CRC patients. Recently, Materazzi, Zagli (49)  
353 exhibited that  $H_2S$  could relax precontracted human mesenteric arterial rings  
354 in a concentration-dependent manner. Moreover, we found that the  
355 relaxation of mesenteric arteries induced by  $Na_2S$  depends on the activation  
356 of  $K_{ATP}$  and  $K_V$  channels. The importance of  $K_{ATP}$  channel activation  
357 confirms in a human colonic mesenteric artery what has already been  
358 observed in the rat arterial smooth muscle by [50] human mammary artery  
359 by [51], either through hyperpolarization of SMCs membrane, in turn might  
360 close voltage-gated  $Ca^{2+}$  channels [52] or through channel protein  
361 sulfhydration [15]. In the same way, in the rat aorta  $H_2S$  induces  
362 vasorelaxation was diminished by KCNQ-type  $K_V$  channels blockage [53].  
363 In contrast [54] had found that  $K_{ATP}$  channels did not mediate the relaxations

364 caused by H<sub>2</sub>S in the guinea-pig ileum and trout urinary bladder. Even  
365 though, K<sub>IR</sub> channels weakly participated in the relaxation of mesenteric  
366 arteries in CRC patients, while previous studies conducted by [55-57] were  
367 reported that the mechanism of relaxation in rat aorta is mainly mediated by  
368 the stimulation of K<sub>IR</sub> channels and subsequent K<sub>IR</sub>-dependent  
369 hyperpolarization from the endothelium to the smooth muscle cells

370 Although, H<sub>2</sub>S was found to activate BK<sub>Ca</sub> [58], IK<sub>Ca</sub>, and SK<sub>Ca</sub> channels  
371 in endothelial cells [15]; and BK<sub>Ca</sub> channels in SMCs of mesenteric arteries  
372 [58] and cerebral arterioles [59]. The results of the present study disclosed  
373 that TEA did not change the vasodilation of mesenteric arteries induced by  
374 Na<sub>2</sub>S, signifying that K<sub>Ca</sub> might not be accountable for H<sub>2</sub>S induced  
375 vasorelaxation. More or less the same results were observed by [60], who  
376 noted that different blockers for K<sub>Ca</sub> channels ineffective in the vascular  
377 effect of H<sub>2</sub>S. Opposite to our results [55] found that the maximum relaxation  
378 of VSMC of rat artery [15, 61] and human mammary artery [51] induced by  
379 NaHS was significantly attenuated by K<sub>Ca</sub> channels blockers.

380 Because both H<sub>2</sub>S and NO are vasorelaxant factors, and they have  
381 dissimilar mechanisms of action, one may predict an improver effect when  
382 the two gases are applied together [50], whereas the results of the current  
383 study showed that the combination of SNP and Na<sub>2</sub>S donors were not  
384 changed maximal relaxation during all time course of the study compared to  
385 SNP and Na<sub>2</sub>S respectively. One explanation is a combination of H<sub>2</sub>S, and  
386 NO generate a new molecule (perhaps nitrosothiol), which does not relax

387 blood vessels either *in vitro* or *in vivo* [62]. Consequently, the formation of  
388 this novel molecule most likely denotes a means for biological inactivation  
389 or perhaps sequestration of released NO [63]. In contrast, rat aortic relaxation  
390 was prolonged when both gas donors are added together [64]. This  
391 synergistic action may be due to the production of HSNO and HNO as a  
392 result of a chemical reaction between H<sub>2</sub>S and nitrite [65], which releases  
393 NO and polysulfides and relax VSMCs through soluble guanylyl cyclase  
394 activation [66].

395 At the same time, preincubation of L-NAME did not change the  
396 relaxation effects induced by Na<sub>2</sub>S. Similar results have been reported by  
397 Ohia, Opere (67); Monjok, Kulkarni (68) they were notified that L-NAME  
398 did not modify the relaxation effects of Na<sub>2</sub>S in isolated porcine irides, this  
399 means that endogenous NO has no impact on the vasoactivity of H<sub>2</sub>S donor.  
400 In contrast, preincubation of CRC arterial rings with PAG increased relaxant  
401 activity induced by NO donor. The proper explanation for this result is that  
402 endogenous H<sub>2</sub>S inhibits the action of NO. In the same manner, SNP-induced  
403 vasorelaxation of rat aorta and human internal mammary artery was  
404 diminished by low concentration of H<sub>2</sub>S by suppressing NO action or  
405 inhibition of NO synthase [52, 60].

## 406 **Conclusion**

407 In conclusion, low Endocan and normal MDA values reveal that  
408 endothelial dysfunction and oxidative stress do not take part in the

409 pathogenesis of CRC. Beside this, the mechanism of NO and H<sub>2</sub>S-induced  
410 mesenteric artery vasodilation is time and K<sup>+</sup> channels dependent, in which  
411 NO dilates mesenteric arteries via activation of K<sub>ATP</sub>, K<sub>Ca</sub>, K<sub>IR</sub> and K<sub>V</sub>  
412 channels, while vasodilation activity of H<sub>2</sub>S is due to the modulation of K<sub>ATP</sub>  
413 and K<sub>V</sub> channels. Moreover, NO and H<sub>2</sub>S are interacting at the level of  
414 enzymes, the activity of CSE enzyme slows down the vasodilator ability of  
415 exogenous NO.

## 416 **Acknowledgements**

417 Our special thanks are due to all staff members of the Oncology  
418 department at Rizgary and Nanakaly hospital for their help, and our highest  
419 appreciation to Dr Saeb Gailany and Dr Imad at CMC and Welfare hospitals  
420 for providing the human patient colonic specimens.

## 421 **References**

- 422 1. Bray F, Ferlay J, Soerjomataram I, Siegel RL, Torre LA, Jemal A.  
423 Global cancer statistics 2018: GLOBOCAN estimates of incidence and  
424 mortality worldwide for 36 cancers in 185 countries. *CA: a cancer journal*  
425 *for clinicians*. 2018;68(6):394-424. doi: doi:10.3322/caac.21492.
- 426 2. Ali Hussein Alhurry AM, Rezaianzadeh A, Rahimikazerooni S,  
427 Abdzaid Akool M, Bahrami F, Shahidinia SS, et al. A Review of the  
428 Incidence of Colorectal Cancer in the Middle East. *Ann Colorectal Res*.  
429 2017;5(3-4):e46292. Epub 2017-03-02. doi: 10.5812/acr.46292.

- 430 3. Khoshnaw N, Mohammed HA, Abdullah DA. Patterns of Cancer in  
431 Kurdistan - Results of Eight Years Cancer Registration in Sulaymaniyah  
432 Province-Kurdistan-Iraq. Asian Pacific Journal of Cancer Prevention.  
433 2016;16(18):8525-31. doi: 10.7314/apjcp.2015.16.18.8525.
- 434 4. Hamza H, Rasul K. The Epidemiology of Colorectal Cancer in Erbil.  
435 Cancer Science & Research. 2018;4(2):1-7. doi: 10.33425/2639-8478.1007.
- 436 5. Yang G, Sener A, Ji Y, Pei Y, Pluth MD. Gasotransmitters in Biology  
437 and Medicine: Molecular Mechanisms and Drug Targets. Oxid Med Cell  
438 Longev. 2016;2016:4627308. doi: 10.1155/2016/4627308. PubMed PMID:  
439 27777644; PubMed Central PMCID: PMC5061972.
- 440 6. Moncada S, Palmer RM, Higgs EA. Biosynthesis of nitric oxide from  
441 L-arginine. A pathway for the regulation of cell function and  
442 communication. Biochem Pharmacol. 1989;38(11):1709-15. Epub  
443 1989/06/01. PubMed PMID: 2567594.
- 444 7. Palmer RM, Rees DD, Ashton DS, Moncada S. L-arginine is the  
445 physiological precursor for the formation of nitric oxide in endothelium-  
446 dependent relaxation. Biochem Biophys Res Commun. 1988;153(3):1251-6.  
447 Epub 1988/06/30. PubMed PMID: 3390182.
- 448 8. Kabil O, Banerjee R. Enzymology of H(2)S Biogenesis, Decay and  
449 Signaling. Antioxidants & redox signaling. 2014;20(5):770-82. doi:  
450 10.1089/ars.2013.5339. PubMed PMID: PMC3910450.

- 451 9. Filipovic MR. Persulfidation (S-sulfhydration) and H<sub>2</sub>S. Handbook of  
452 experimental pharmacology. 2015;230:29-59. doi: 10.1007/978-3-319-  
453 18144-8\_2. PubMed PMID: 26162828.
- 454 10. Wang R. Two's company, three's a crowd: can H<sub>2</sub>S be the third  
455 endogenous gaseous transmitter? *Faseb J.* 2002;16(13):1792-8.
- 456 11. Wang R, Cheng Y, Wu L. The Role of Hydrogen Sulfide as an  
457 Endogenous Vasorelaxant Factor. In: Wang R, editor. *Signal Transduction  
458 and the Gasotransmitters*: Humana Press; 2004. p. 323-32.
- 459 12. Nematollahi S, Nematbakhsh M, Haghjooyjavanmard S, Khazaei M,  
460 Salehi M. Inducible nitric oxide synthase modulates angiogenesis in  
461 ischemic hindlimb of rat. *Biomedical papers of the Medical Faculty of the  
462 University Palacky, Olomouc, Czechoslovakia.* 2009;153(2):125-9. Epub  
463 2009/09/23. PubMed PMID: 19771137.
- 464 13. Luscher TF, Boulanger CM, Dohi Y, Yang ZH. Endothelium-derived  
465 contracting factors. *Hypertension.* 1992;19(2):117-30. Epub 1992/02/01.  
466 PubMed PMID: 1737645.
- 467 14. Chadha PS, Liu L, Rikard-Bell M, Senadheera S, Howitt L, Bertrand  
468 RL, et al. Endothelium-dependent vasodilation in human mesenteric artery  
469 is primarily mediated by myoendothelial gap junctions intermediate  
470 conductance calcium-activated K<sup>+</sup> channel and nitric oxide. *J Pharmacol  
471 Exp Ther.* 2011;336(3):701-8. doi: 10.1124/jpet.110.165795. PubMed  
472 PMID: 21172909.

- 473 15. Mustafa AK, Sikka G, Gazi SK, Steppan J, Jung SM, Bhunia AK, et  
474 al. Hydrogen sulfide as endothelium-derived hyperpolarizing factor  
475 sulfhydrates potassium channels. *Circ Res.* 2011;109(11):1259-68. Epub  
476 2011/10/08. doi: 10.1161/circresaha.111.240242. PubMed PMID:  
477 21980127; PubMed Central PMCID: PMC3234531.
- 478 16. Szabó C, Papapetropoulos A. Hydrogen sulphide and angiogenesis:  
479 mechanisms and applications. *Br J Pharmacol.* 2011;164(3):853-65. doi:  
480 10.1111/j.1476-5381.2010.01191.x. PubMed PMID: 21198548; PubMed  
481 Central PMCID: PMC3195910.
- 482 17. Tang G, Wu L, Liang W, Wang R. Direct stimulation of K(ATP)  
483 channels by exogenous and endogenous hydrogen sulfide in vascular smooth  
484 muscle cells. *Mol Pharmacol.* 2005;68(6):1757-64. doi:  
485 10.1124/mol.105.017467.
- 486 18. Coletta C, Papapetropoulos A, Erdelyi K, Olah G, Modis K,  
487 Panopoulos P, et al. Hydrogen sulfide and nitric oxide are mutually  
488 dependent in the regulation of angiogenesis and endothelium-dependent  
489 vasorelaxation. *PNAS.* 2012;109(23):9161-6. Epub 2012/05/10. doi:  
490 10.1073/pnas.1202916109. PubMed PMID: 22570497; PubMed Central  
491 PMCID: PMC3384190.
- 492 19. Mistry RK, Brewer AC. Redox regulation of gasotransmission in the  
493 vascular system: A focus on angiogenesis. *Free radical biology & medicine.*  
494 2017;108:500-16. Epub 2017/04/24. doi:

- 495 10.1016/j.freeradbiomed.2017.04.025. PubMed PMID: 28433660; PubMed  
496 Central PMCID: PMCPMC5698259.
- 497 20. Hu Q, Wu D, Ma F, Yang S, Tan B, Xin H, et al. Novel Angiogenic  
498 Activity and Molecular Mechanisms of ZYZ-803, a Slow-Releasing  
499 Hydrogen Sulfide-Nitric Oxide Hybrid Molecule. *Antioxid Redox Signal.*  
500 2016;25(8):498-514. doi: 10.1089/ars.2015.6607. PubMed PMID:  
501 27174595.
- 502 21. Kashfi K. The dichotomous role of H<sub>2</sub>S in cancer cell biology? Deja  
503 vu all over again. *Biochem Pharmacol.* 2018. doi:  
504 10.1016/j.bcp.2018.01.042. PubMed PMID: 29397935.
- 505 22. Szabo C. Gasotransmitters in cancer: from pathophysiology to  
506 experimental therapy. *Nature reviews Drug discovery.* 2016;15(3):185-203.  
507 Epub 2015/12/19. doi: 10.1038/nrd.2015.1. PubMed PMID: 26678620;  
508 PubMed Central PMCID: PMCPMC5319818.
- 509 23. Olah G, Modis K, Toro G, Hellmich MR, Szczesny B, Szabo C. Role  
510 of endogenous and exogenous nitric oxide, carbon monoxide and hydrogen  
511 sulfide in HCT116 colon cancer cell proliferation. *Biochem Pharmacol.*  
512 2017. doi: 10.1016/j.bcp.2017.10.011. PubMed PMID: 29074106.
- 513 24. Kather JN, Zollner FG, Schad LR, Melchers SM, Sinn HP, Marx A,  
514 et al. Identification of a characteristic vascular belt zone in human colorectal  
515 cancer. *PloS one.* 2017;12(3):e0171378. doi:  
516 10.1371/journal.pone.0171378. PubMed PMID: 28253263; PubMed Central  
517 PMCID: PMCPMC5333981.



- 518 25. Sonveaux P. Provascular strategy: targeting functional adaptations of  
519 mature blood vessels in tumors to selectively influence the tumor vascular  
520 reactivity and improve cancer treatment. *Radiother Oncol.* 2008;86(3):300-  
521 13. doi: 10.1016/j.radonc.2008.01.024. PubMed PMID: 18313779.
- 522 26. Sosa V, Moline T, Somoza R, Paciucci R, Kondoh H, ME LL.  
523 Oxidative stress and cancer: an overview. *Ageing research reviews.*  
524 2013;12(1):376-90. doi: 10.1016/j.arr.2012.10.004. PubMed PMID:  
525 23123177.
- 526 27. Gill JG, Piskounova E, Morrison SJ. Cancer, Oxidative Stress, and  
527 Metastasis. *Cold Spring Harb Symp Quant Biol.* 2016;81:163-75. doi:  
528 10.1101/sqb.2016.81.030791. PubMed PMID: 28082378.
- 529 28. Reuter S, Gupta SC, Chaturvedi MM, Aggarwal BB. Oxidative stress,  
530 inflammation, and cancer: How are they linked? *Free Radical Biology and*  
531 *Medicine.* 2010;49(11):1603-16. doi: 10.1016/j.freeradbiomed.2010.09.006.
- 532 29. Perse M. Oxidative Stress in the Pathogenesis of Colorectal Cancer:  
533 Cause or Consequence? *BioMed research international.* 2013;2013:9. doi:  
534 10.1155/2013/725710.
- 535 30. Ohkawa H, Ohishi N, Yagi K. Assay for lipid peroxides in animal  
536 tissues by thiobarbituric acid reaction. *Anal Biochem.* 1979;95(2):351-8.
- 537 31. Furchgott RF, Zawadzki JV. The obligatory role of endothelial cells  
538 in the relaxation of arterial smooth muscle by acetylcholine. *Nature.*  
539 1980;288(5789):373-6. Epub 1980/11/27. PubMed PMID: 6253831.

- 540 32. Zuo L, Zhang S-M, Hu R-L, Zhu H-Q, Zhou Q, Gui S-Y, et al.  
541 Correlation between expression and differentiation of endocan in colorectal  
542 cancer. *World journal of gastroenterology : WJG*. 2008;14(28):4562-8. doi:  
543 10.3748/wjg.14.4562. PubMed PMID: PMC2731287.
- 544 33. Hatfield KJ, Lassalle P, Leiva RA, Lindas R, Wendelboe O, Bruslerud  
545 O. Serum levels of endothelium-derived endocan are increased in patients  
546 with untreated acute myeloid leukemia. *Hematology (Amsterdam,*  
547 *Netherlands)*. 2011;16(6):351-6. Epub 2011/12/21. doi:  
548 10.1179/102453311x13127324303434. PubMed PMID: 22183069.
- 549 34. Yang J, Yang Q, Yu S, Zhang X. Endocan: A new marker for cancer  
550 and a target for cancer therapy. *Biomedical Reports*. 2015;3(3):279-83. doi:  
551 10.3892/br.2015.438. PubMed PMID: 26137222; PubMed Central PMCID:  
552 PMC4467225.
- 553 35. Delehedde M, Devenyns L, Maurage CA, Vives RR. Endocan in  
554 cancers: a lesson from a circulating dermatan sulfate proteoglycan. *Int J Cell*  
555 *Biol*. 2013;2013:705027. doi: 10.1155/2013/705027. PubMed PMID:  
556 23606845; PubMed Central PMCID: PMC3625564.
- 557 36. Pardo LA, Stuhmer W. The roles of K<sup>+</sup> channels in cancer. *Nature*  
558 *reviews Cancer*. 2014;14(1):39-48. doi: 10.1038/nrc3635.
- 559 37. Gonenc A, Erten D, Aslan S, Akinci M, Simsek B, Torun M. Lipid  
560 peroxidation and antioxidant status in blood and tissue of malignant breast  
561 tumor and benign breast disease. *Cell biology international*. 2006;30(4):376-

- 562 80. Epub 2006/04/18. doi: 10.1016/j.cellbi.2006.02.005. PubMed PMID:  
563 16616293.
- 564 38. Skrzydlewska E, Sulkowski S, Koda M, Zalewski B, Kanczuga-Koda  
565 L, Sulkowska M. Lipid peroxidation and antioxidant status in colorectal  
566 cancer. *World journal of gastroenterology : WJG*. 2005;11(3):403-6. doi:  
567 10.3748/wjg.v11.i3.403. PubMed PMID: 15637754; PubMed Central  
568 PMCID: PMC4205348.
- 569 39. Subramanyam D, Subbaiah KV, Rajendra W, Lokanatha V. Serum  
570 selenium concentration and antioxidant activity in cervical cancer patients  
571 before and after treatment. *Experimental oncology*. 2013;35(2):97-100.  
572 Epub 2013/07/06. PubMed PMID: 23828383.
- 573 40. Plane F, Sampson LJ, Smith JJ, Garland CJ. Relaxation to authentic  
574 nitric oxide and SIN-1 in rat isolated mesenteric arteries: variable role for  
575 smooth muscle hyperpolarization. *Br J Pharmacol*. 2001;133(5):665-72.  
576 Epub 2001/06/29. doi: 10.1038/sj.bjp.0704127. PubMed PMID: 11429390;  
577 PubMed Central PMCID: PMC4205348.
- 578 41. Chalon S, Tejura B, Moreno H, Urae A, Blaschke TF, Hoffman BB.  
579 Role of nitric oxide in isoprenaline and sodium nitroprusside-induced  
580 relaxation in human hand veins. *British Journal of Clinical Pharmacology*.  
581 1999;47(1):91-8. doi: 10.1046/j.1365-2125.1999.00863.x. PubMed PMID:  
582 10073745; PubMed Central PMCID: PMC4205348.

- 583 42. Brayden JE. Functional roles of KATP channels in vascular smooth  
584 muscle. *Clin Exp Pharmacol Physiol*. 2002;29(4):312-6. Epub 2002/05/03.  
585 PubMed PMID: 11985542.
- 586 43. Félétou M. Calcium-activated potassium channels and endothelial  
587 dysfunction: therapeutic options? *British Journal of Pharmacology*.  
588 2009;156(4):545-62. doi: 10.1111/j.1476-5381.2009.00052.x. PubMed  
589 PMID: PMC2697708.
- 590 44. Ko EA, Han J, Jung ID, Park WS. Physiological roles of K<sup>+</sup> channels  
591 in vascular smooth muscle cells. *J Smooth Muscle Res*. 2008;44(2):65-81.  
592 Epub 2008/06/17. PubMed PMID: 18552454.
- 593 45. Stankevicius E, Dalsgaard T, Kroigaard C, Beck L, Boedtkjer E,  
594 Misfeldt MW, et al. Opening of small and intermediate calcium-activated  
595 potassium channels induces relaxation mainly mediated by nitric-oxide  
596 release in large arteries and endothelium-derived hyperpolarizing factor in  
597 small arteries from rat. *J Pharmacol Exp Ther*. 2011;339(3):842-50. Epub  
598 2011/09/02. doi: 10.1124/jpet.111.179242. PubMed PMID: 21880870.
- 599 46. Jiang J, Thoren P, Caligiuri G, Hansson GK, Pernow J. Enhanced  
600 phenylephrine-induced rhythmic activity in the atherosclerotic mouse aorta  
601 via an increase in opening of K<sub>Ca</sub> channels: relation to K<sub>v</sub> channels and  
602 nitric oxide. *Br J Pharmacol*. 1999;128(3):637-46. Epub 1999/10/12. doi:  
603 10.1038/sj.bjp.0702855. PubMed PMID: 10516643; PubMed Central  
604 PMCID: PMCPmc1571694.

- 605 47. Schubert R, Krien U, Wulfsen I, Schiemann D, Lehmann G, Ulfig N,  
606 et al. Nitric oxide donor sodium nitroprusside dilates rat small arteries by  
607 activation of inward rectifier potassium channels. *Hypertension*.  
608 2004;43(4):891-6. Epub 2004/03/03. doi:  
609 10.1161/01.HYP.0000121882.42731.6b. PubMed PMID: 14993195.
- 610 48. Hempelmann RG, Seebeck J, Kruse ML, Ziegler A, Mehdorn HM.  
611 Role of potassium channels in the relaxation induced by the nitric oxide (NO)  
612 donor DEA/NO in the isolated rat basilar artery. *Neuroscience letters*.  
613 2001;313(1-2):21-4. Epub 2001/10/31. PubMed PMID: 11684330.
- 614 49. Materazzi S, Zagli G, Nassini R, Bartolini I, Romagnoli S, Chelazzi  
615 C, et al. Vasodilator activity of hydrogen sulfide (H<sub>2</sub>S) in human mesenteric  
616 arteries. *Microvasc Res*. 2017;109:38-44. doi: 10.1016/j.mvr.2016.11.001.  
617 PubMed PMID: 27818253.
- 618 50. Zhao W, Zhang J, Lu Y, Wang R. The vasorelaxant effect of H<sub>2</sub>S as  
619 a novel endogenous gaseous K(ATP) channel opener. *The EMBO Journal*.  
620 2001;20(21):6008-16. doi: 10.1093/emboj/20.21.6008. PubMed PMID:  
621 PMC125693.
- 622 51. Webb GD, Lim LH, Oh VM, Yeo SB, Cheong YP, Ali MY, et al.  
623 Contractile and vasorelaxant effects of hydrogen sulfide and its biosynthesis  
624 in the human internal mammary artery. *J Pharmacol Exp Ther*.  
625 2008;324(2):876-82. doi: 10.1124/jpet.107.133538. PubMed PMID:  
626 18029544.

- 627 52. Zhao W, Wang R. H<sub>2</sub>S-induced vasorelaxation and underlying  
628 cellular and molecular mechanisms. *Am J Physiol Heart Circ Physiol.*  
629 2002;283(2):H474-80. Epub 2002/07/19. doi: 10.1152/ajpheart.00013.2002.  
630 PubMed PMID: 12124191.
- 631 53. Kohn C, Schleifenbaum J, Szijarto IA, Marko L, Dubrovskaja G, Huang  
632 Y, et al. Differential effects of cystathionine-gamma-lyase-dependent  
633 vasodilatory H<sub>2</sub>S in periaortic vasoregulation of rat and mouse aortas.  
634 *PloS one.* 2012;7(8):e41951. Epub 2012/08/08. doi:  
635 10.1371/journal.pone.0041951. PubMed PMID: 22870268; PubMed Central  
636 PMCID: PMCPmc3411702.
- 637 54. Teague B, Asiedu S, Moore PK. The smooth muscle relaxant effect of  
638 hydrogen sulphide in vitro: evidence for a physiological role to control  
639 intestinal contractility. *Br J Pharmacol.* 2002;137(2):139-45. Epub  
640 2002/09/05. doi: 10.1038/sj.bjp.0704858. PubMed PMID: 12208769;  
641 PubMed Central PMCID: PMCPmc1573483.
- 642 55. Al-Magableh MR, Hart JL. Mechanism of vasorelaxation and role of  
643 endogenous hydrogen sulfide production in mouse aorta. *Naunyn  
644 Schmiedeberg's Arch Pharmacol.* 2011;383(4):403-13.
- 645 56. Doughty JM, Boyle JP, Langton PD. Blockade of chloride channels  
646 reveals relaxations of rat small mesenteric arteries to raised potassium. *Br J  
647 Pharmacol.* 2001;132(1):293-301. Epub 2001/01/13. doi:  
648 10.1038/sj.bjp.0703769. PubMed PMID: 11156589; PubMed Central  
649 PMCID: PMCPMC1572528.

- 650 57. Salihi A. Activation of Inward Rectifier Potassium Channels in High  
651 Salt Impairment of Hydrogen Sulfide-Induced Aortic Relaxation in Rats.  
652 *Physiology and Pharmacology*. 2015;19(4):263-73.
- 653 58. Jackson-Weaver O, Osmond JM, Riddle MA, Naik JS, Gonzalez Bosc  
654 LV, Walker BR, et al. Hydrogen sulfide dilates rat mesenteric arteries by  
655 activating endothelial large-conductance Ca(2)(+)-activated K(+) channels  
656 and smooth muscle Ca(2)(+) sparks. *Am J Physiol Heart Circ Physiol*.  
657 2013;304(11):H1446-54. Epub 2013/03/26. doi:  
658 10.1152/ajpheart.00506.2012. PubMed PMID: 23525712; PubMed Central  
659 PMCID: PMCPmc4073893.
- 660 59. Liang GH, Xi Q, Leffler CW, Jaggar JH. Hydrogen sulfide activates  
661 Ca(2)(+) sparks to induce cerebral arteriole dilatation. *J Physiol*.  
662 2012;590(11):2709-20. Epub 2012/04/18. doi:  
663 10.1113/jphysiol.2011.225128. PubMed PMID: 22508960; PubMed Central  
664 PMCID: PMCPmc3424726.
- 665 60. Tang G, Wu L, Wang R. Interaction of hydrogen sulfide with ion  
666 channels. *Clin Exp Pharmacol Physiol*. 2010;37(7):753-63. Epub  
667 2010/07/20. doi: 10.1111/j.1440-1681.2010.05351.x. PubMed PMID:  
668 20636621.
- 669 61. Zhao W, Zhang J, Lu Y, Wang R. The vasorelaxant effect of H(2)S as  
670 a novel endogenous gaseous K(ATP) channel opener. *Embo j*.  
671 2001;20(21):6008-16. Epub 2001/11/02. doi: 10.1093/emboj/20.21.6008.  
672 PubMed PMID: 11689441; PubMed Central PMCID: PMCPMC125693.

- 673 62. Whiteman M, Li L, Kostetski I, Chu SH, Siau JL, Bhatia M, et al.  
674 Evidence for the formation of a novel nitrosothiol from the gaseous  
675 mediators nitric oxide and hydrogen sulphide. *Biochem Biophys Res*  
676 *Commun.* 2006;343(1):303-10.
- 677 63. Ali MY, Ping CY, Mok YY, Ling L, Whiteman M, Bhatia M, et al.  
678 Regulation of vascular nitric oxide in vitro and in vivo; a new role for  
679 endogenous hydrogen sulphide? *Br J Pharmacol.* 2006;149(6):625-34.
- 680 64. Salihi ABQ, Shekha MS, Al-Habib OAM. Vasodilatory effects of  
681 nitric oxide, hydrogen sulfide and sulfur dioxide in rats: Time-dependent  
682 interaction study. *Progress in Biological Sciences.* 2016;6(1):19-30.
- 683 65. Filipovic MR, Miljkovic JL, Nauser T, Royzen M, Klos K, Shubina  
684 T, et al. Chemical Characterization of the Smallest S-Nitrosothiol, HSNO;  
685 Cellular Cross-talk of H<sub>2</sub>S and S-Nitrosothiols. *Journal of the American*  
686 *Chemical Society.* 2012;134(29):12016-27. doi: 10.1021/ja3009693.  
687 PubMed PMID: PMC3408084.
- 688 66. Cortese-Krott MM, Fernandez BO, Santos JL, Mergia E, Grman M,  
689 Nagy P, et al. Nitrosopersulfide (SSNO(-)) accounts for sustained NO  
690 bioactivity of S-nitrosothiols following reaction with sulfide. *Redox Biol.*  
691 2014;2:234-44. Epub 2014/02/05. doi: 10.1016/j.redox.2013.12.031.  
692 PubMed PMID: 24494198; PubMed Central PMCID: PMC3909780.
- 693 67. Ohia SE, Opere CA, Monjok EM, Kouamou G, Leday AM, Njie-  
694 Mbye YF. Role of hydrogen sulfide production in inhibitory action of L-



695 cysteine on isolated porcine irides. *Current eye research*. 2010;35(5):402-7.  
696 doi: 10.3109/02713680903576716. PubMed PMID: 20450253.

697 68. Monjok EM, Kulkarni KH, Kouamou G, McKoy M, Opere CA,  
698 Bongmba ON, et al. Inhibitory action of hydrogen sulfide on muscarinic  
699 receptor-induced contraction of isolated porcine irides. *Exp Eye Res*.  
700 2008;87(6):612-6. Epub 2008/10/23. doi: 10.1016/j.exer.2008.09.011.  
701 PubMed PMID: 18940190.



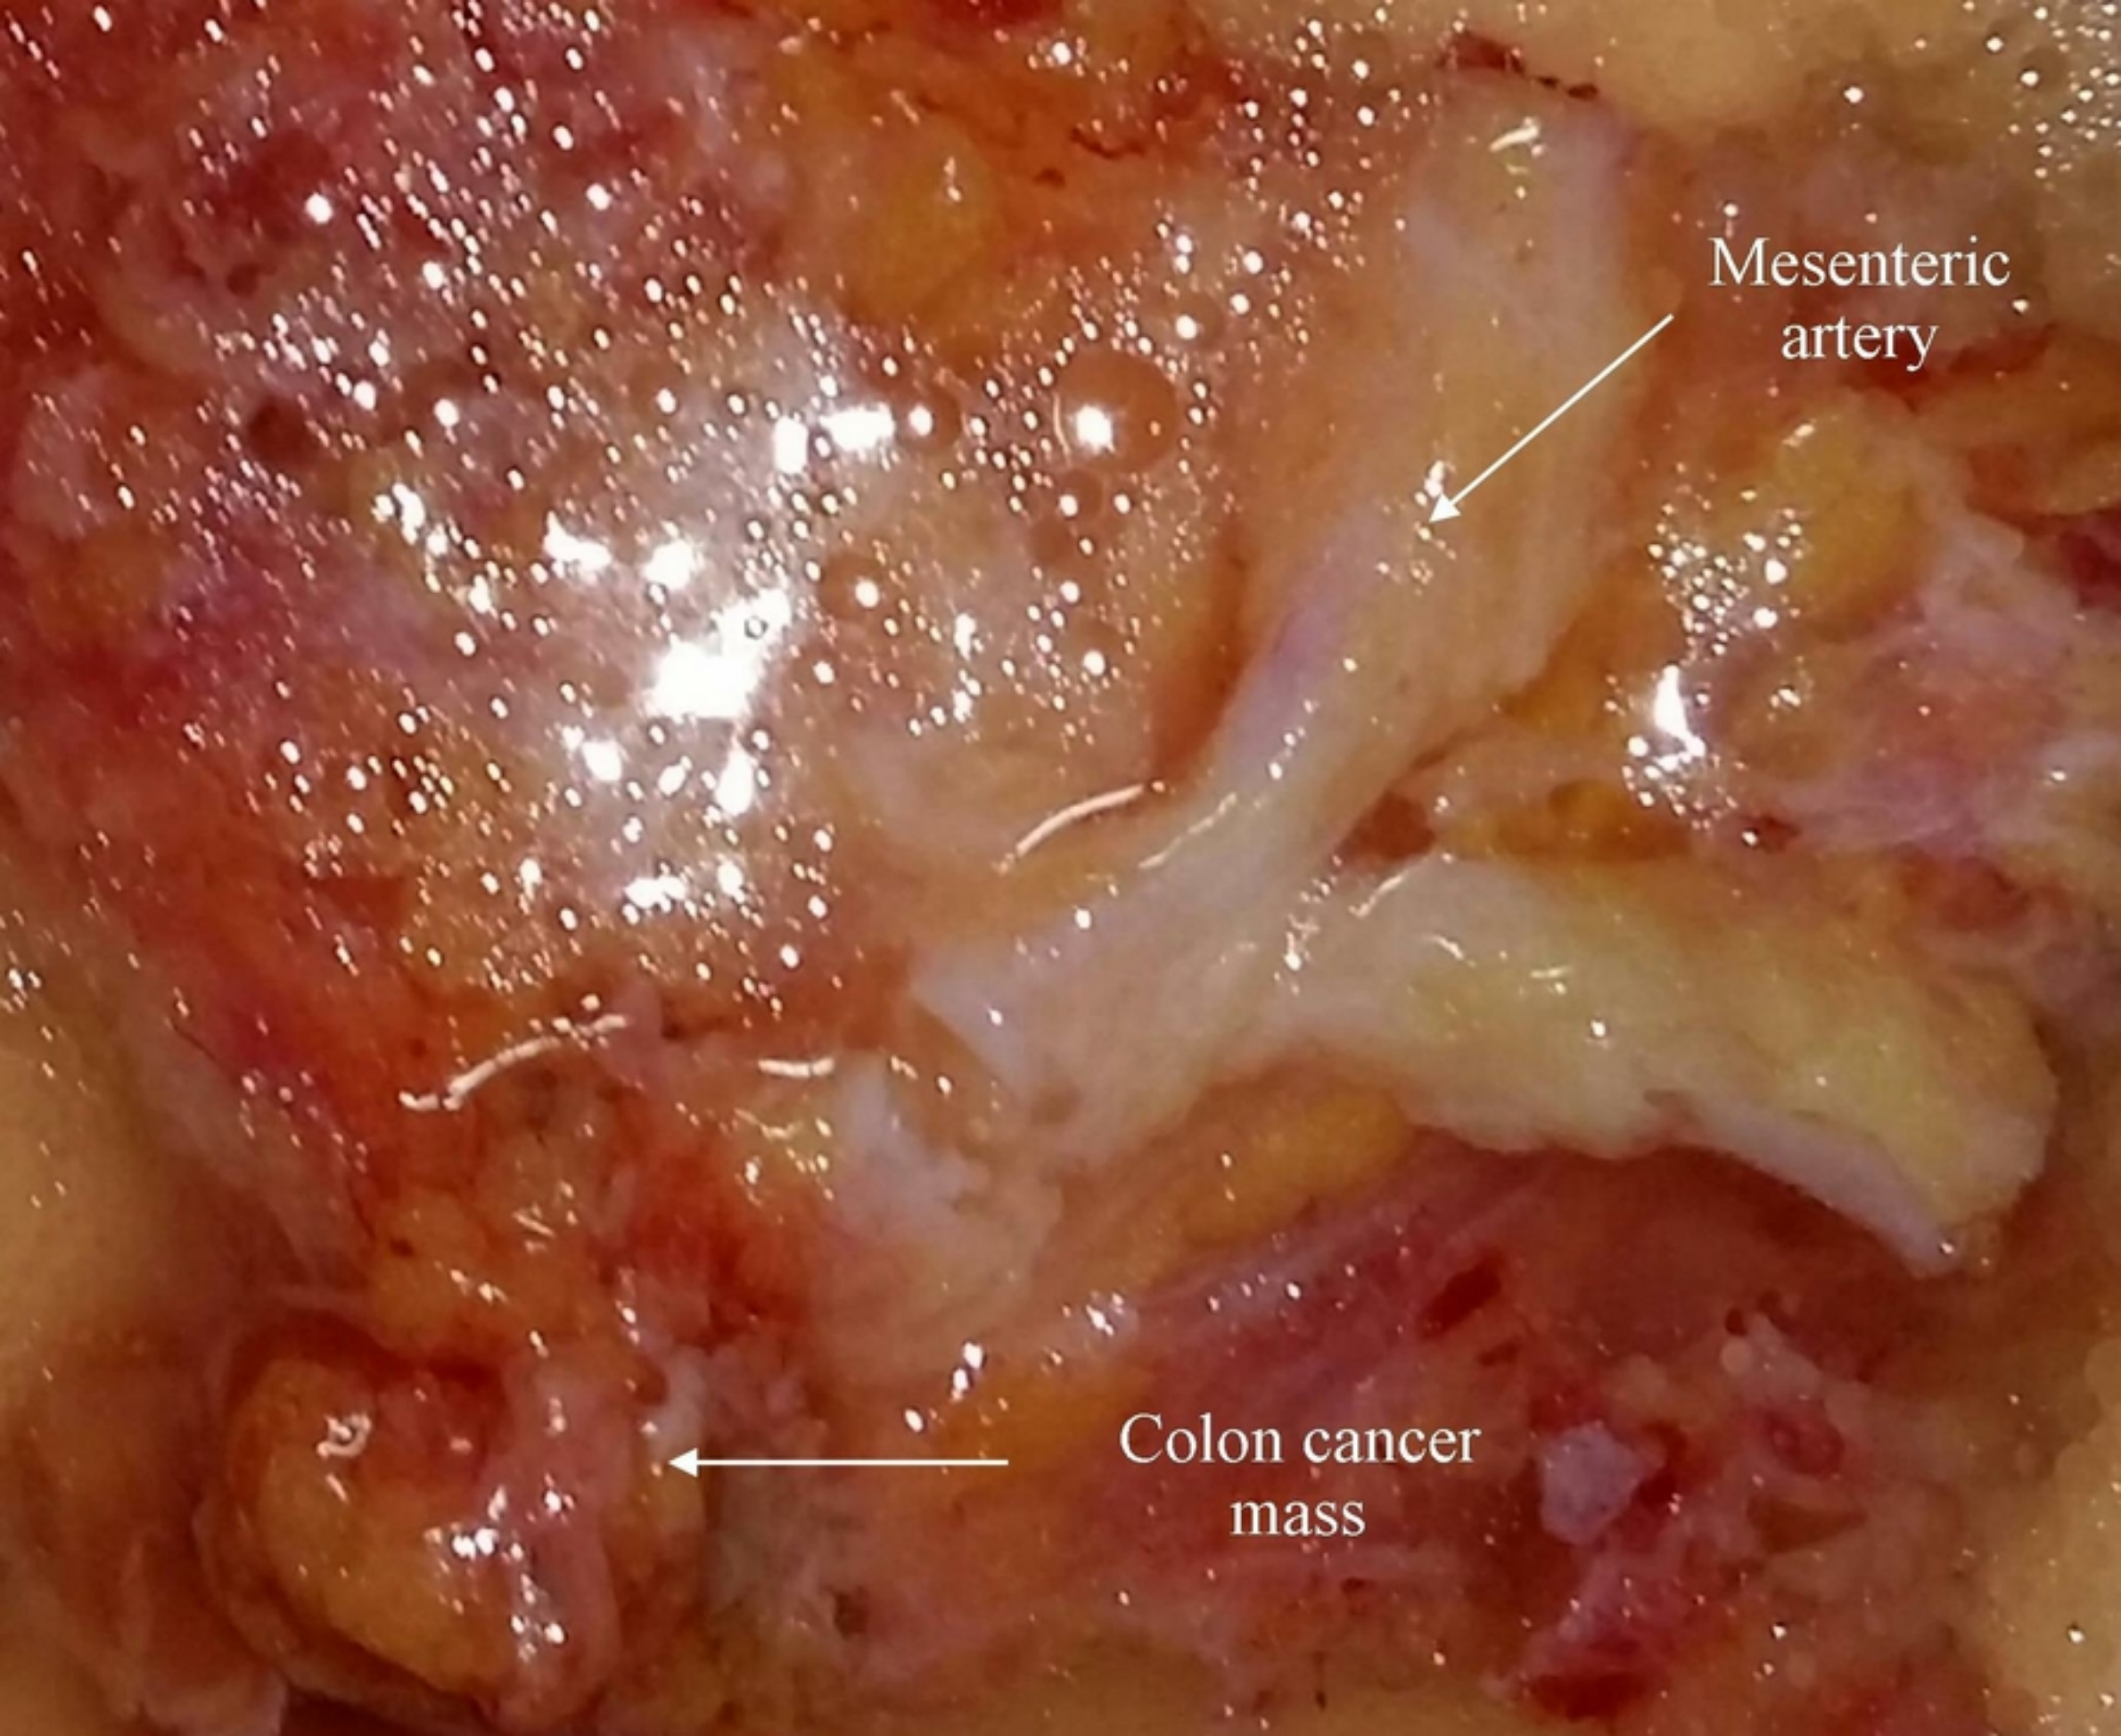

Mesenteric  
artery

Colon cancer  
mass

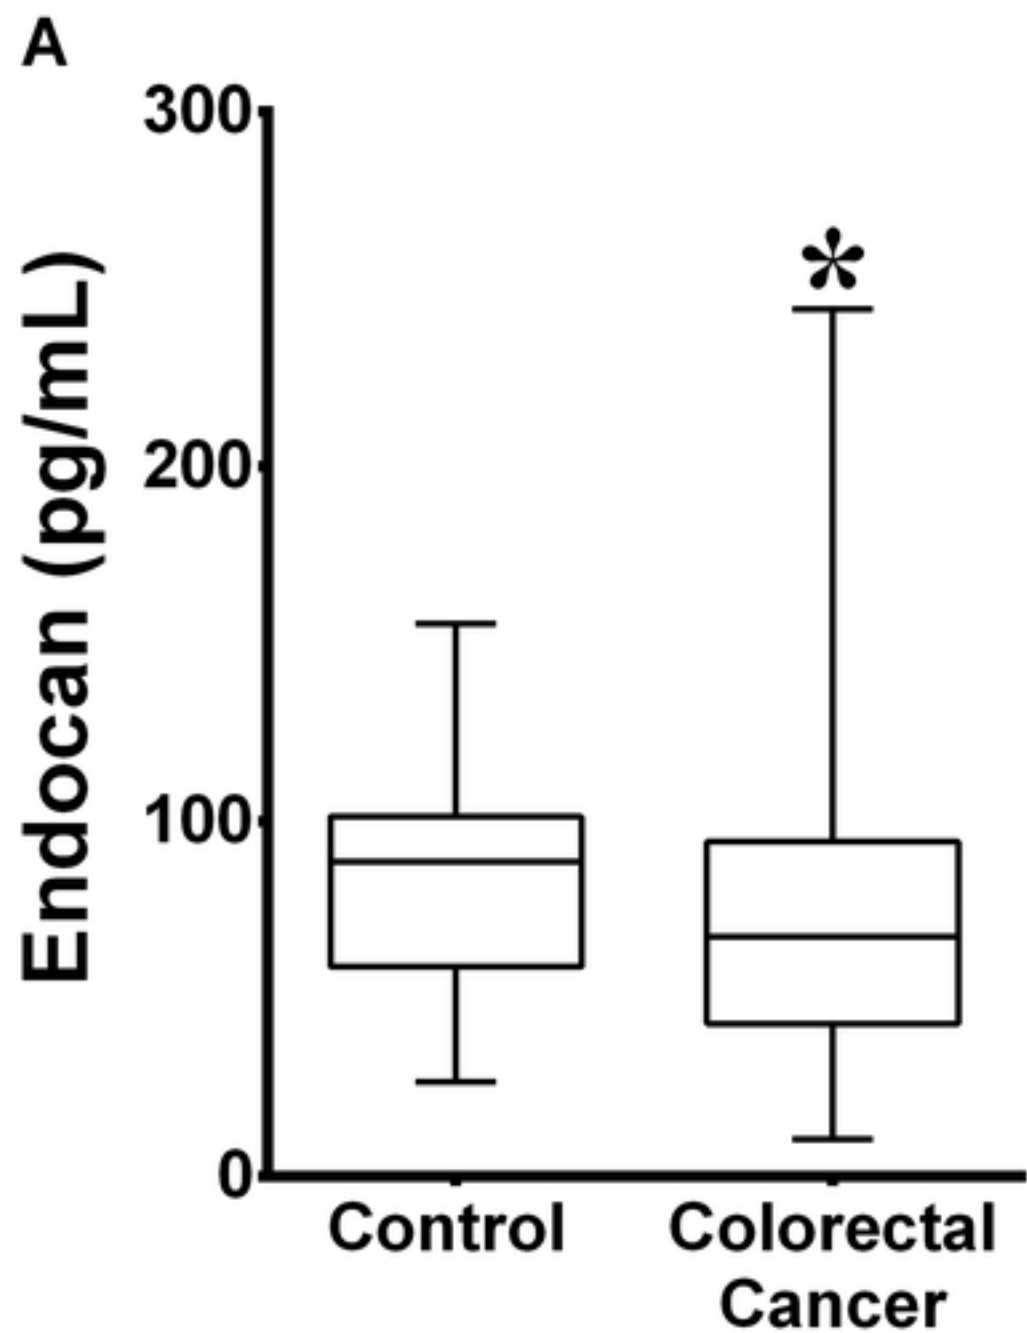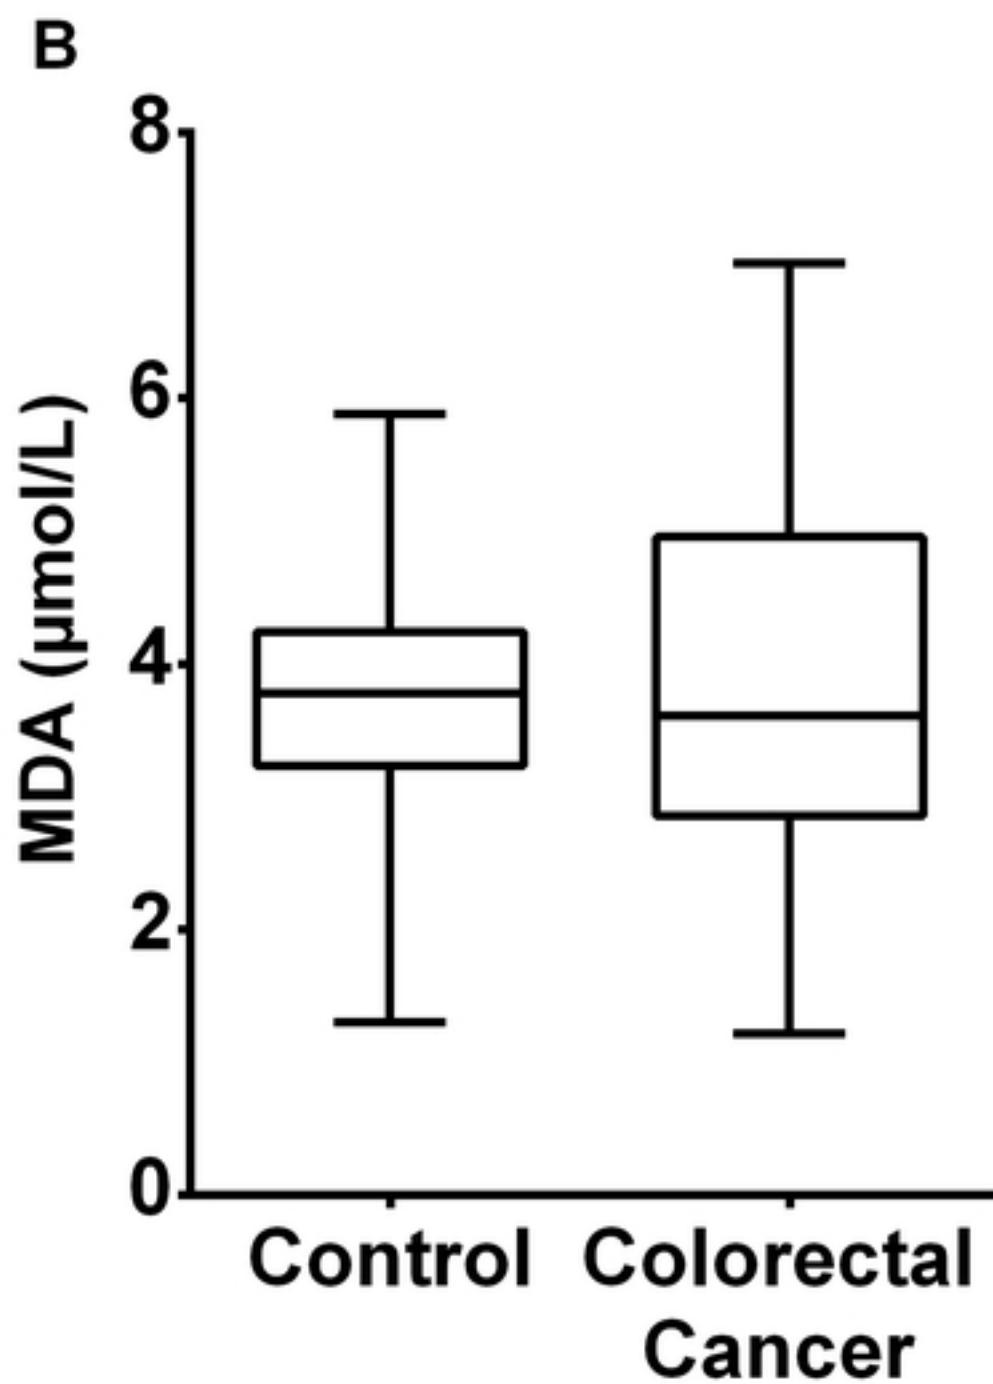

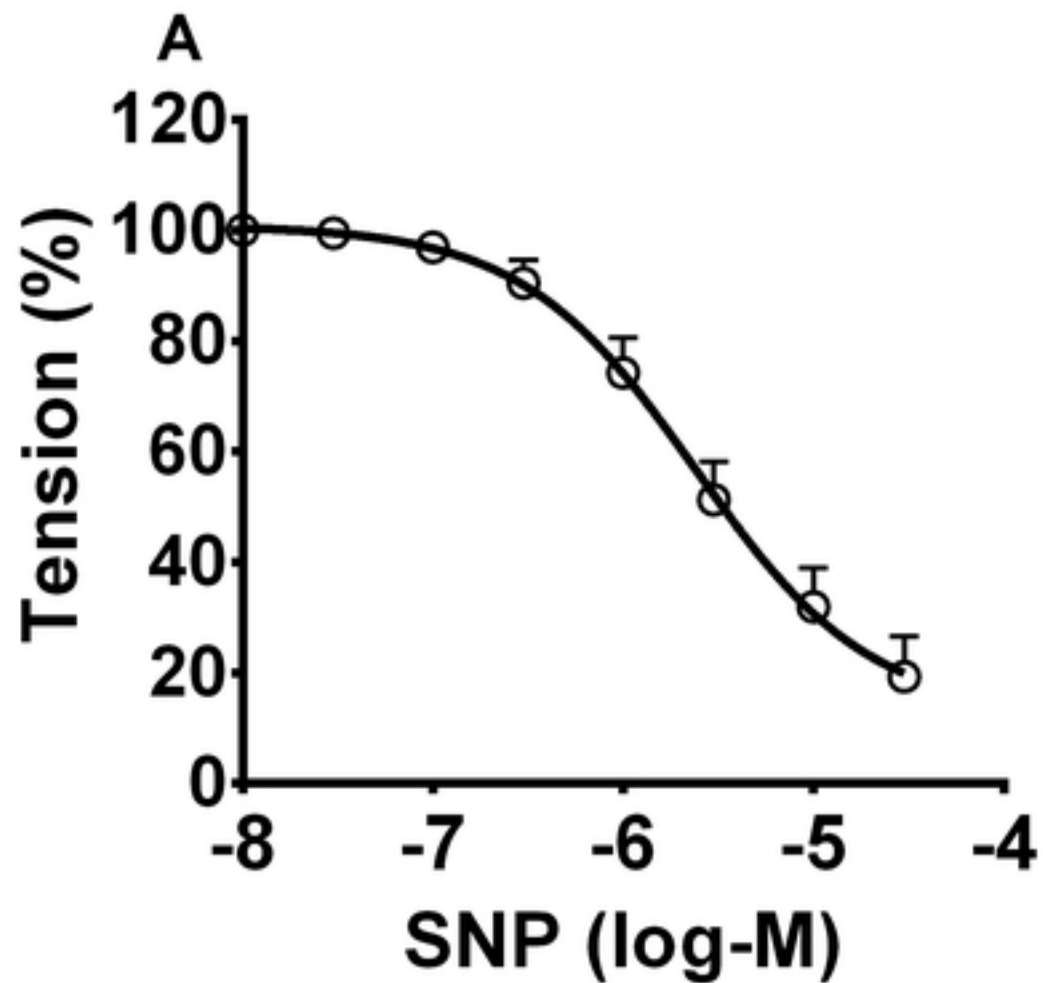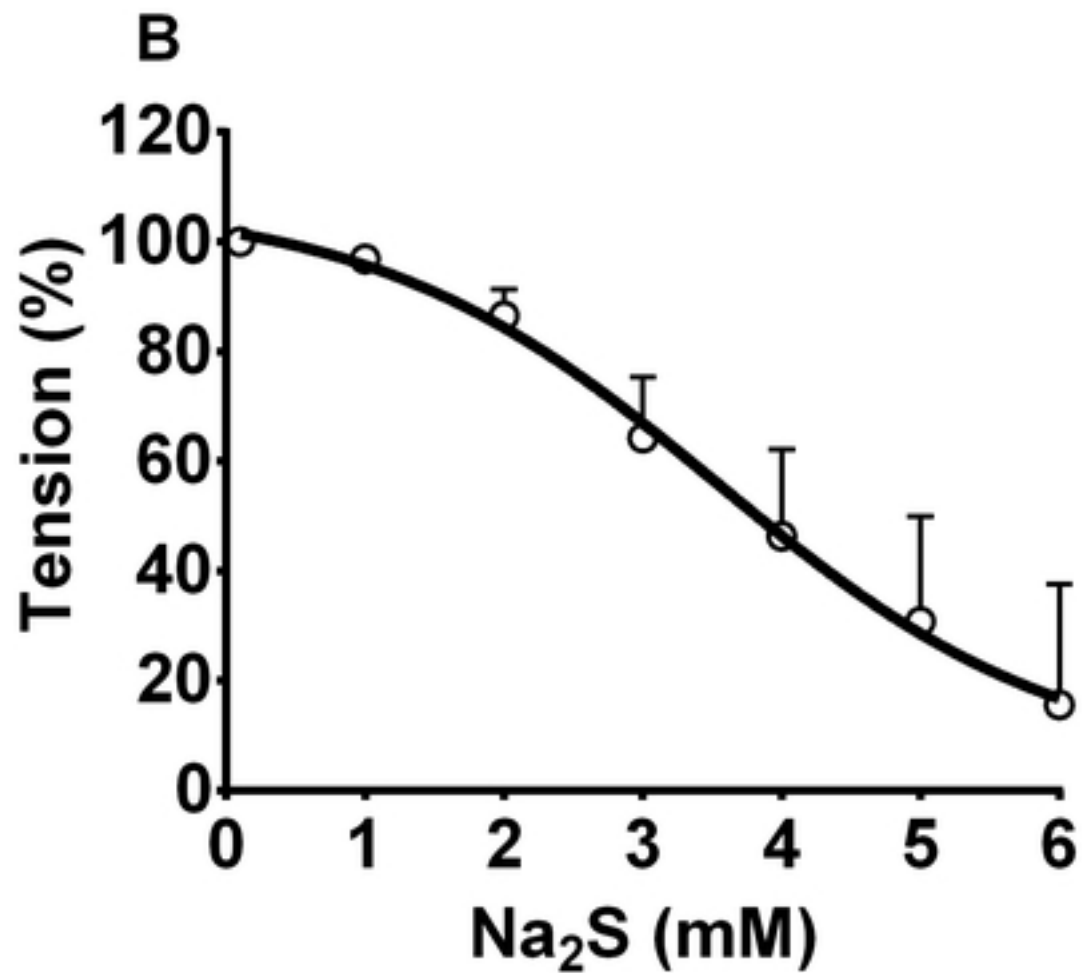

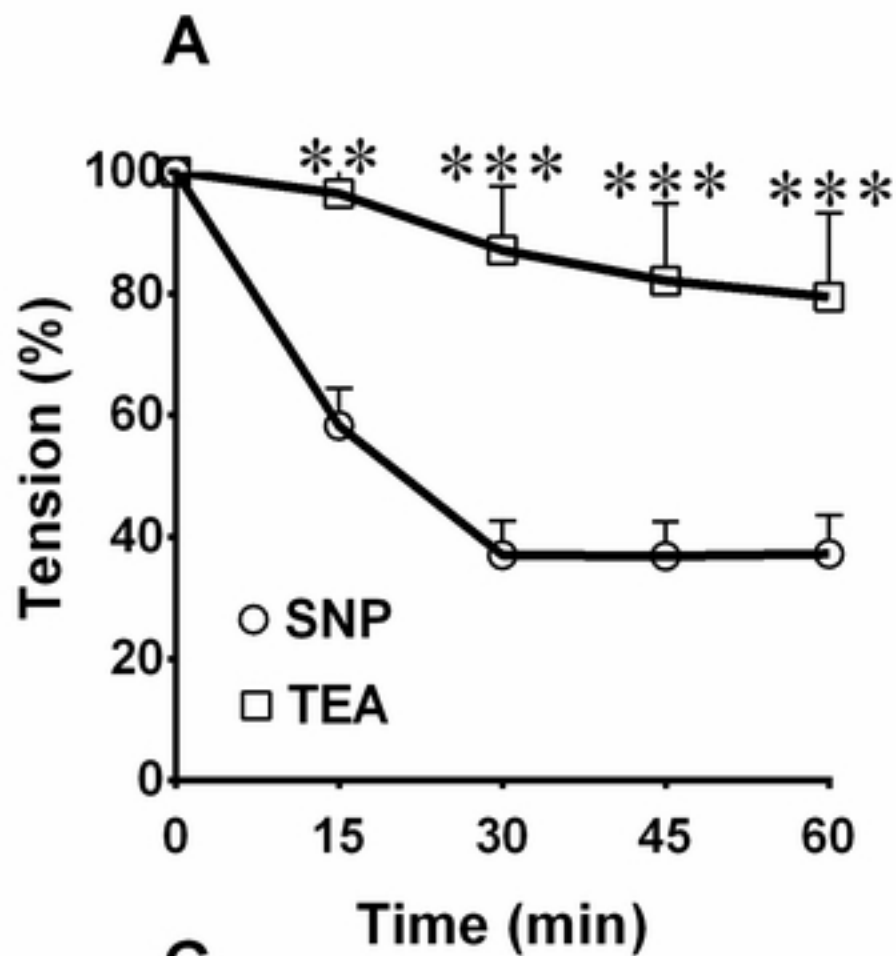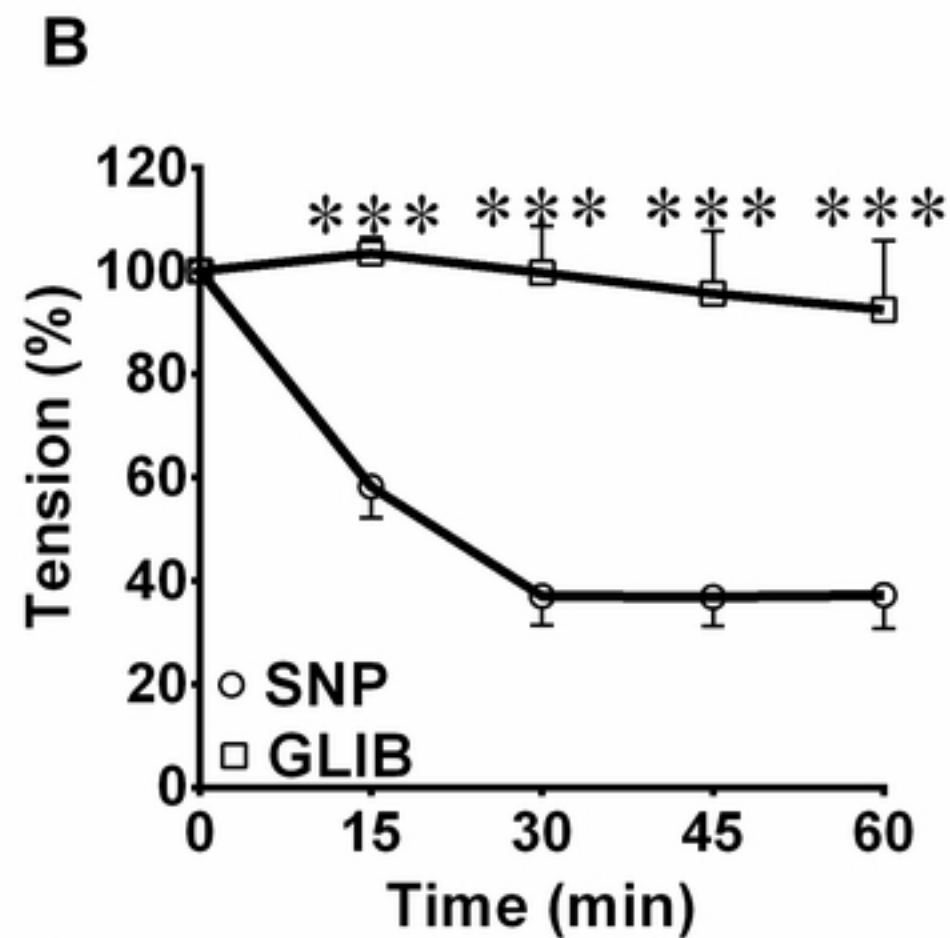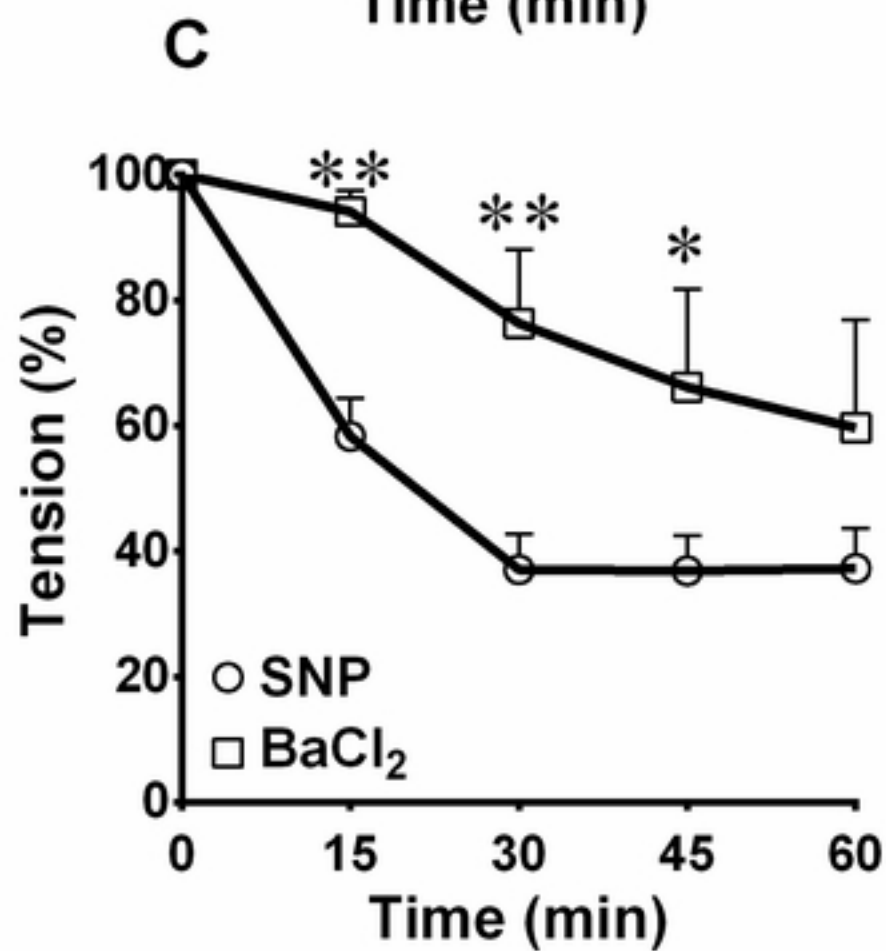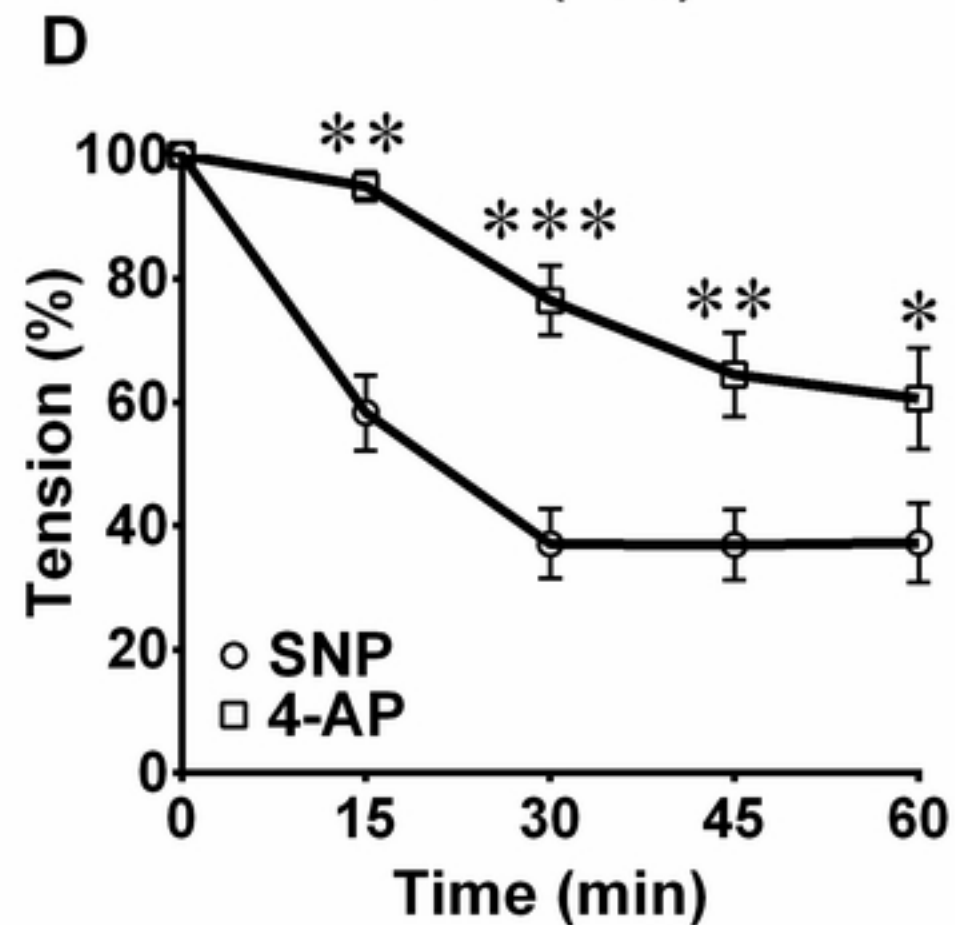

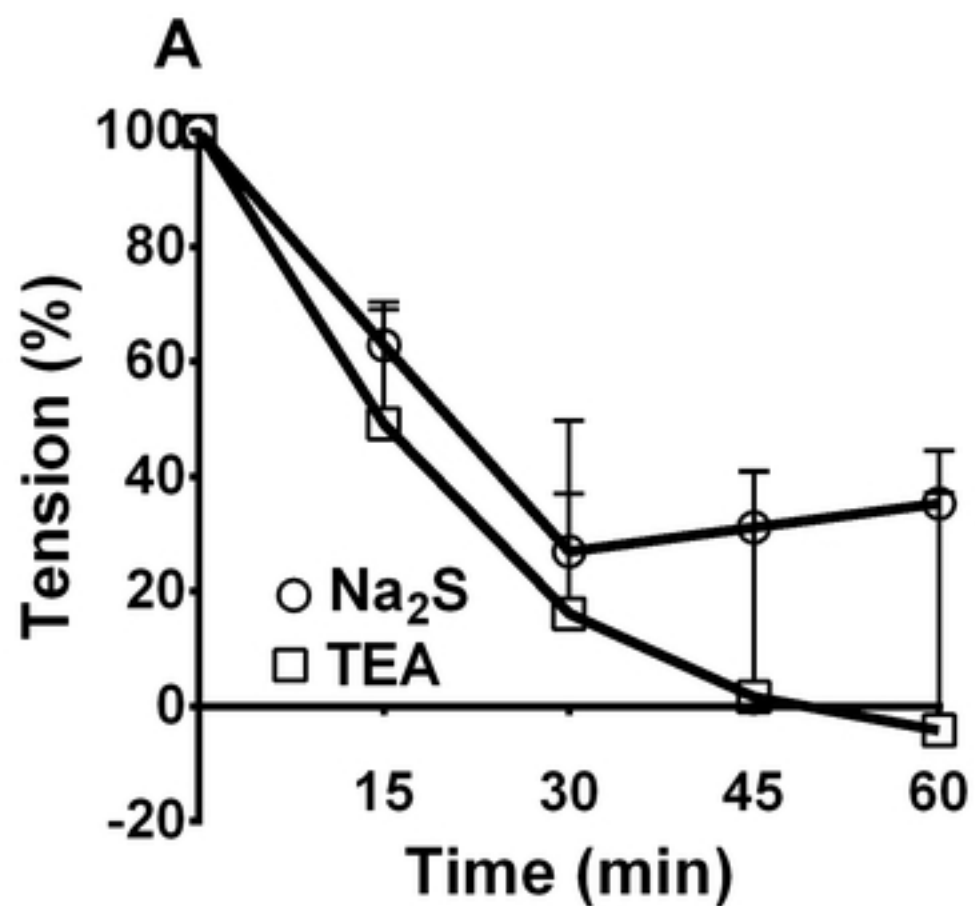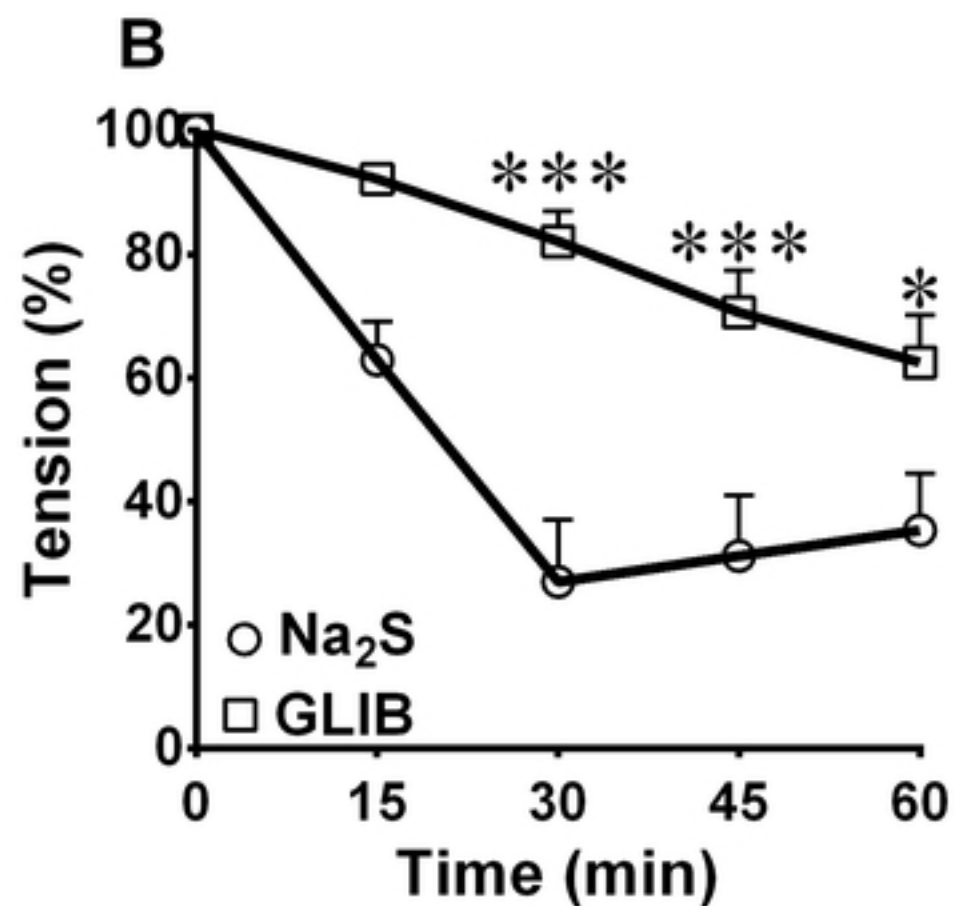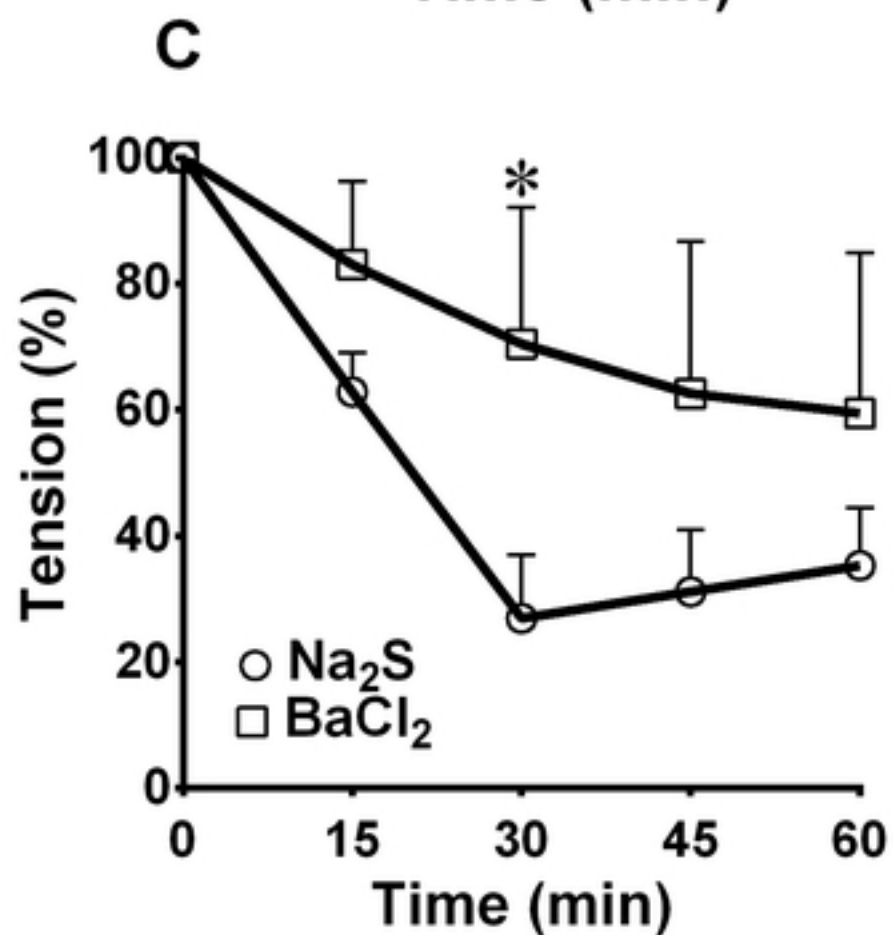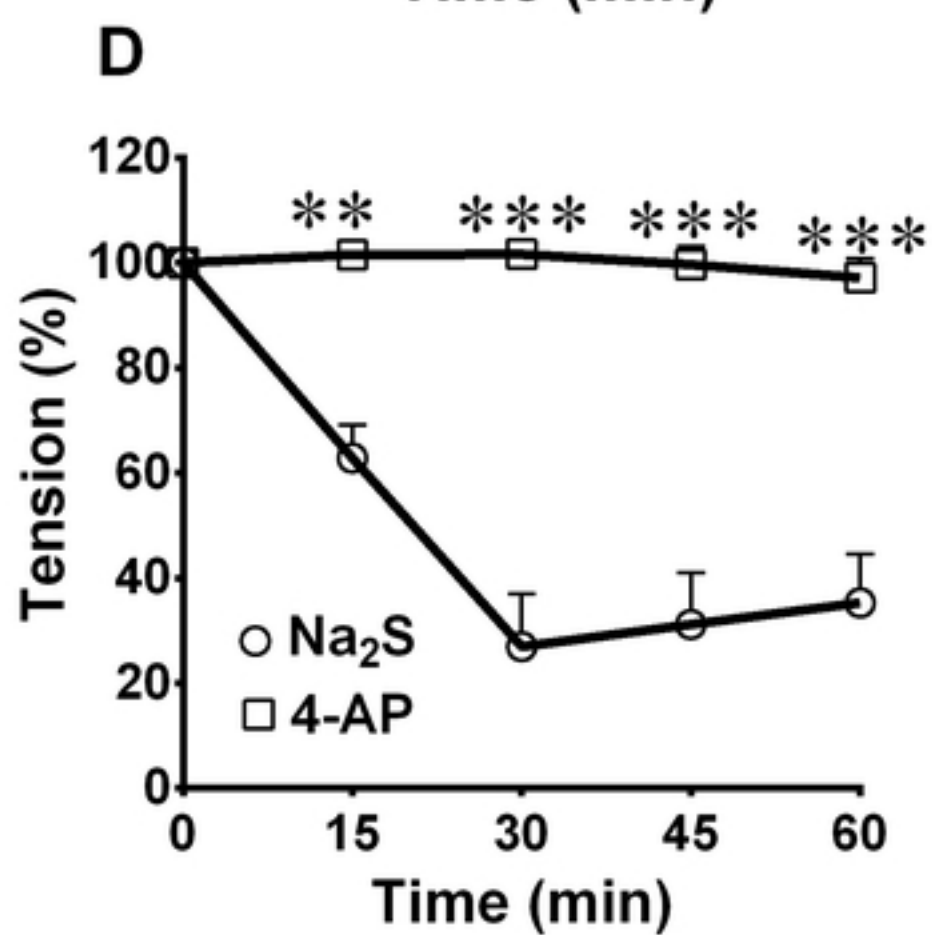

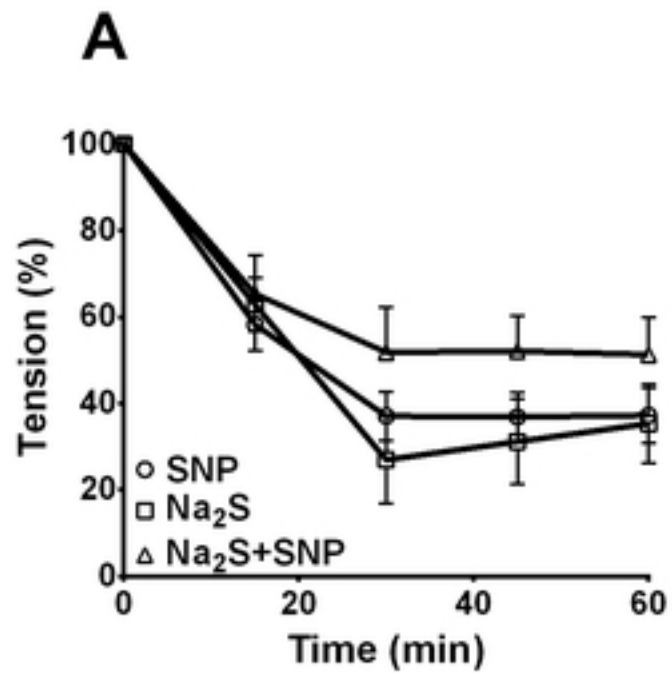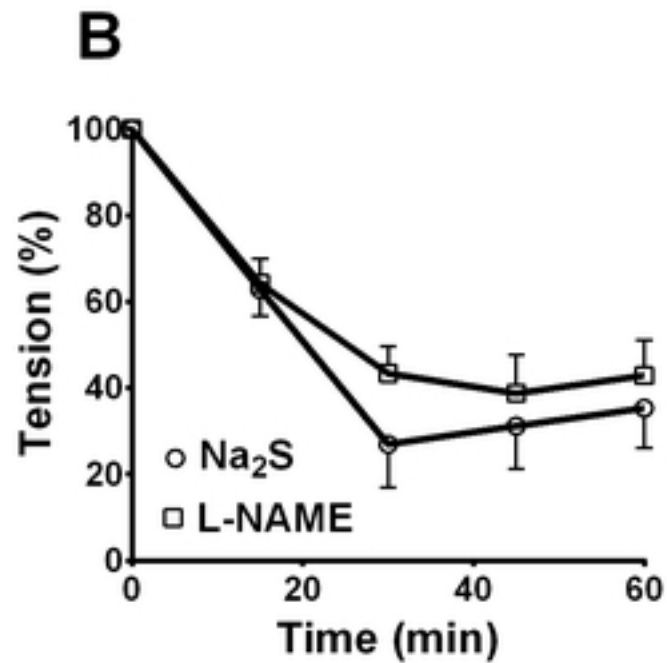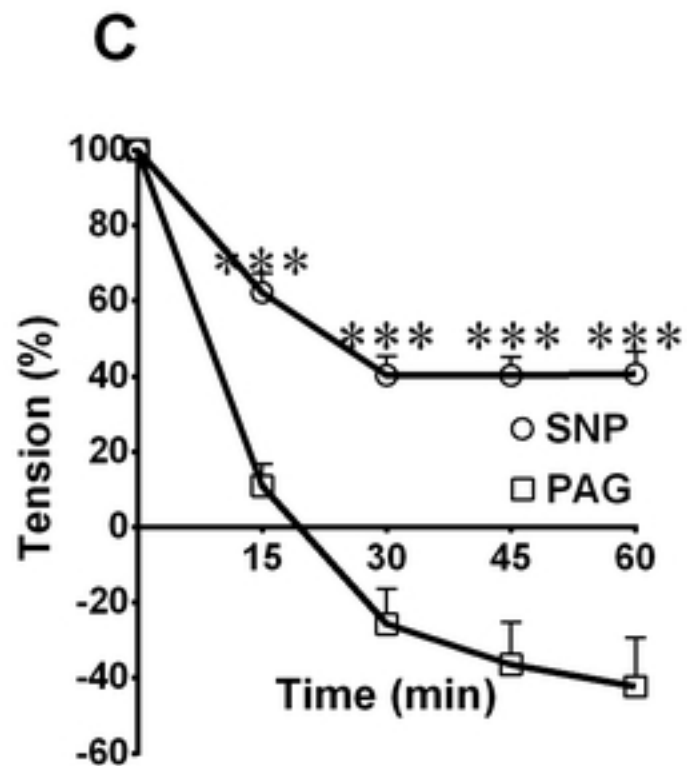

Source: https://www.biorxiv.org/content/10.1101/666834v1.full.pdf
